# Supplementary material for: Multivariate Analysis of Determinants and Development of a Predictive Algorithm for Successful Labor Induction in Nulliparous Women
Source: Research Square preprint supplement (doi:10.21203/rs.3.rs-5990931/v1), 2025-04-21
Supplement: Supplementary file 1 [file 25845a5d9e6d5c572ac5988a.xlsx]

## Sheet: Sheet1
Natural delivery or cesarean section	Hardness ratio HR	Elastic Contrast Index (ECI)	Strain value IOS of cervical opening	Cervical external strain value EOS	Strain ratio of cervical internal and external opening	Cervical length CL	Bishop rating	Fetal weight	BMI	Age	Pregnancy history	Birth history	Premature birth history (yes/no)	History of cervical surgery	History of cervical cerclage surgery (yes/no)	Smoking history (yes/no)	Progesterone use	Illegal drug use	Abnormal uterine development	Pregnancy methods (natural conception, IVF-ET, ovulation induction, etc.)
0	23.2267	3.6	0.316667	0.49	0.646259	2.83	5	3100	24.0346	31	1	0	0	0	0	0	1	0	0	0
0	49.6	4.31	0.393333	0.69	0.570048	3.73	6	2780	17.5781	29	1	0	0	0	0	0	1	0	0	0
0	33.0333	5	0.36	0.29	1.24138	1.43	5	2520	22.8624	24	1	0	0	0	0	0	0	0	0	0
0	37.3333	3.68	0.486667	0.46	1.05797	2.41	6	2610	23.03	28	1	0	0	0	0	0	1	0	0	0
0	48.1	2.63333	0.323333	0.47	0.687943	2.03	5	3410	2.90154	29	1	0	0	0	0	0	1	0	0	0
0	37.5333	5.4	0.256667	0.45	0.570371	3.17	6	3230	20.9042	32	1	0	0	1（leep）	0	0	1	0	0	0
0	17.5333	1.81333	0.57	0.38	1.5	2.37	4	3020	23.6244	33	1	0	0	0	0	0	0	0	0	0
0	52.4333	3.19667	0.33	0.36	0.916667	2.52	6	3110	26.3702	32	1	0	0	0	0	0	1	0	0	0
0	46.2	4.27	0.316667	0.41	0.772359	1.8	5	3210	18.75	31	1	0	0	0	0	0	0	0	0	0
0	50.1133	3.23333	0.37	0.4	0.925	4.02	6	3310	24.093	30	1	0	0	0	0	0	0	0	0	0
0	42.96	3.14	0.243333	0.23	1.05797	2.47	6	3450	20.4294	29	1	0	0	0	0	0	1	0	0	0
0	58.6667	5.69333	0.286667	0.43	0.666667	2.88	6	2630	19.313	30	1	0	0	0	0	0	0	0	0	0
0	41.3333	4.98333	0.473333	0.29	1.63218	1.71	4	3230	17.8506	30	1	0	0	0	0	0	0	0	0	0
0	45.4567	3.60667	0.62	0.38	1.63158	1.66	6	3310	25.3906	31	1	0	0	0	0	0	0	0	0	0
0	49.5667	5.01667	0.323333	0.49	0.659863	2.5	4	3410	21.83	32	1	0	0	0	0	0	0	0	0	0
0	41.3667	4.95333	0.413333	0.37	1.11712	2.19	4	3610	22.3081	30	1	0	0	0	0	0	0	0	0	0
0	50.3	3.58667	0.553333	0.34	1.62745	2.78	6	3100	20.1956	27	1	0	0	0	0	0	0	0	0	0
0	48.4	2.51	0.313333	0.34	0.921568	2	6	3120	21.6311	34	1	0	0	0	0	0	0	0	0	0
0	50.0333	2.67333	0.423333	0.3	1.41111	1.63	6	2760	20.8117	33	1	0	0	0	0	0	0	0	0	0
0	62.3667	3.71667	0.313333	0.39	0.803418	3.61	5	3050	17.6898	30	1	0	0	0	0	0	0	0	0	0
0	36.8333	3.67667	0.426667	0.24	1.77778	3.4	4	4170	27.5482	28	1	0	0	0	0	0	0	0	0	0
0	37.6667	4.47	0.523333	0.28	1.86905	3.76	6	3320	19.721	32	1	0	0	0	0	0	0	0	0	0
0	35.6667	5.54667	0.506667	0.33	1.53535	3.27	6	2430	24.1672	25	1	0	0	0	0	0	0	0	0	0
0	44.8	3.82667	0.376667	0.46	0.818841	1.43	5	3500	19.9481	29	1	0	0	0	0	0	1	0	0	0
0	47.4333	5.15667	0.29	0.45	0.644444	1.92	5	2450	20.5761	32	1	0	0	0	0	0	0	0	0	0
0	65.38	2.82667	0.266667	0.38	0.701755	4.05	4	2560	20.8325	31	1	0	0	0	0	0	1	0	0	0
0	12.4433	4.80333	0.52	0.25	2.08	1.69	6	2450	18.5078	24	1	0	0	0	0	0	0	0	0	0
0	40.0967	3.11333	0.376667	0.39	0.965813	2.67	5	3070	16.937	27	1	0	0	0	0	0	0	0	0	0
0	38.9667	4.11667	0.393333	0.35	1.12381	3.7	4	3860	27.2392	31	1	0	0	0	0	0	1	0	0	0
0	33.2333	3.76	0.47	0.34	1.38235	2	5	3560	28.959	28	1	0	0	0	0	0	1	0	0	0
0	36.3	4.14333	0.413333	0.21	1.96825	2.51	6	2670	15.0551	26	1	0	0	0	0	0	1	0	0	0
0	57.2967	2.65	0.253333	0.36	0.703703	2.05	4	3230	20.5049	29	1	0	0	0	0	0	0	0	0	0
0	55.9333	3.54	0.32	0.39	0.820513	2.25	6	4160	23.1911	31	1	0	0	0	0	0	1	0	0	0
0	52.3333	3.99667	0.316667	0.39	0.811967	1.98	5	2360	22.0386	28	1	0	0	0	0	0	0	0	0	0
0	44.3067	5.54333	0.36	0.45	0.8	1.71	6	3000	29.9688	25	1	0	0		0	0	1	0	0	0
0	43	4.27667	0.403333	0.39	1.03419	3.1	6	3270	23.2335	27	1	0	0	0	0	0	0	0	0	0
0	47	2.70667	0.353333	0.29	1.21839	2.32	5	2780	23.0332	29	1	0	0	0	0	0	1	0	0	0
0	50.8667	3.31	0.366667	0.38	0.964913	2.4	4	2560	21.875	30	1	0	0	0	0	0	1	0	0	0
0	52.4	2.27667	0.42	0.47	0.893617	1.08	6	2430	17.0068	30	1	0	0	0	0	0	0	0	0	0
0	42.7	3.18333	0.246667	0.27	0.913581	2.53	6	2350	19.721	30	1	0	0	0	0	0	0	0	0	0
0	51.8	3.19667	0.293333	0.68	0.431372	3.68	5	2240	24.1672	22	1	0	0	0	0	0	0	0	0	0
0	10.5133	5.06	0.416667	0.4	1.04167	2.8	4	2100	23.4337	35	1	0	0	0	0	0	1	0	0	0
0	49.4333	4.19	0.4	0.31	1.29032	1.52	5	2570	19.3625	24	1	0	0	0	0	0	0	0	0	0
0	32.9667	4.79333	0.463333	0.46	1.00725	2.72	5	2670	22.0386	29	1	0	0	0	0	0	0	0	0	0
0	21.5867	2.64	0.326667	0.37	0.882884	3.15	6	2560	18.75	30	1	0	0	0	0	0	0	0	0	0
0	50.8333	5.22	0.276667	0.46	0.60145	2.7	4	2880	22.0386	36	1	0	0	0	0	0	1	0	0	0
0	36.0333	4.51	0.62	0.51	1.21569	3.12	5	3160	17.6254	30	1	0	0	0	0	0	1	0	0	0
0	52.6	2.73667	0.346667	0.39	0.88889	2.4	4	2780	18.1449	29	1	0	0	1	0	0	0	0	0	0
0	43.7	5.17	0.53	0.24	2.20833	2.77	5	3680	19.3337	30	1	0	0	0	0	0	0	0	0	0
0	67.9	4.27333	0.293333	0.37	0.792792	1.67	6	3160	24.0346	31	1	0	0	0	0	0	1	0	0	0
0	52.2	3.16	0.293333	0.34	0.862744	2.96	6	2820	21.9076	25	1	0	0	1		0	0		0	0
0	47.2333	3.25333	0.216667	0.43	0.503877	2.17	6	3320	21.4844	31	1	0	0	0		0	0		0	0
0	32.5667	4.92	0.393333	0.31	1.26882	1.43	6	3450	22.3081	30	1	0	0	0	0	0	1	0	0	0
0	52.4067	2.98	0.323333	0.36	0.898147	2.46	6	3610	19.3772	29	1	0	0	0	0	0	0	0	0	0
0	61.6667	4.04333	0.306667	0.39	0.786326	2.5	4	3910	18.8189	27	1	0	0	0	0	0	0	0	0	0
0	43.3	3.54333	0.513333	0.39	1.31624	2.38	5	3180	24.2215	28	1	0	0	0	0	0	0	0	0	0
0	50.2	5.75667	0.2567	0.44	0.583409	3.47	6	3450	25.3906	23	1	0	0	0	0	0	1	0	0	0
0	37.2667	5.18	0.536667	0.31	1.73118	1.78	5	3210	25.9701	28	1	0	0	0	0	0	1	0	0	0
0	54.1	3.06333	0.44	0.32	1.375	1.94	6	3310	22.6409	27	1	0	0	0	0	0	0	0	0	0
0	58.1867	5.15667	0.343333	0.26	1.32051	2.49	5	2780	20.5761	29	1	0	0	0	0	0	0	0	0	0
0	42.74	4.90667	0.456667	0.42	1.0873	1.97	4	3180	19.4734	28	1	0	0	0	0	0	0	0	0	0
0	59	5.23	0.32	0.45	0.711111	2.02	5	3670	23.5078	32	1	0	0	0	0	0	0	0	0	0
0	40.7667	4.25333	0.47	0.72	0.652778	2.02	6	3090	18.3655	34	1	0	0	0	0	0	1	0	0	0
0	50.6333	3.50333	0.38	0.3	1.26667	2.25	4	3010	18.7328	29	1	0	0	0	0	0	0	0	0	0
0	71.2667	3.74333	0.286667	0.31	0.924732	1.72	6	2890	20.8209	30	1	0	0	0	0	0	0	0	0	0
0	41.3333	4.72	0.36	0.5	0.72	2.43	5	2730	20.4294	31	1	0	0	0	0	0	0	0	0	0
0	61	5.29333	0.42	0.45	0.933333	1.98	5	2720	20.9644	27	1	0	0	0	0	0	0	0	0
0	72.0667	2.19333	0.2	0.5	0.4	2.85	6	2670	23.8087	24	1	0	0	0	0	0	0	0	0	0
0	57.4	4.17333	0.256667	0.38	0.675439	1.84	4	2550	19.2277	26	1	0	0	0	0	0	1	0	0	0
0	55.4667	5.22667	0.39	0.6	0.65	2.55	5	2770	20.202	29	1	0	0	0	0	0	0	0	0	0
0	51.2867	4.68333	0.396667	0.45	0.881482	2.5	6	3150	22.3081	27	1	0	0	0	0	0	0	0	0	0
0	55.1033	5.36	0.346667	0.36	0.962964	1.98	4	3800	19.9219	31	1	0	0	0	0	0	1	0	0	0
0	49.5033	6.01667	0.446667	0.32	1.39583	2.15	6	3000	17.1875	28	1	0	0	0	0	0	0	0	0	0
0	45.64	5.46333	0.366667	0.28	1.30953	4.49	5	2370	21.0772	35	1	0	0	0	0	0	0	0	0	0
0	48.5	3.31333	0.39	0.67	0.58209	3.38	6	2560	21.0772	28	1	0	0	0	0	0	1	0	0	0
0	48.0333	4.46333	0.606667	0.42	1.44445	3.23	6	2710	22.9421	29	1	0	0	0	0	0	0	0	0	0
0	51.2333	4.48	0.373333	0.3	1.24444	2.44	4	2900	18.7783	28	1	0	0	0	0	0	1	0	0	0
0	38.66	3.25333	0.31	0.42	0.738095	3.51	5	2610	24.4352	28	1	0	0	0	0	0	1	0	0	0
0	46.1533	3.67667	0.453333	0.45	1.00741	2.65	4	2890	24.0234	31	1	0	0	0	0	0	0	0	0	0
0	54.8667	4.89667	0.306667	0.37	0.82883	2.75	6	3250	24.2215	22	1	0	0	1	0	0	0	0	0	0
0	38.4667	2.34333	0.426667	0.41	1.04065	2.82	6	2600	22.4059	29	1	0	0	0	0	0	0	0	0	0
0	46.1633	4.13	0.413333	0.27	1.53086	2.28	6	3670	21.2183	25	1	0	0	0	0	0	1	0	0	0
0	39.2333	2.53333	0.423333	0.3	1.41111	3.18	4	3710	16.8802	26	1	0	0	0	0	0	0	0	0	0
0	38.8	3.89667	0.446667	0.39	1.1453	2.13	5	2340	21.0303	33	1	0	0	0	0	0	0	0	0	0
0	41.9667	2.94333	0.246667	0.45	0.548149	1.86	5	2760	31.0512	25	1	0	0	0	0	0	0	0	0	0
0	26.9367	6.09	0.583333	0.43	1.35659	2.27	5	2560	22.0386	31	1	0	0	0	0	0	0		0	0
0	68.3	2.50333	0.346667	0.37	0.936938	2.87	5	2780	22.4766	30	1	0	0	0	0	0	0	0	0	0
0	57.2	4.12333	0.3	0.45	0.666667	4.6	4	3110	25.8264	26	1	0	0	0	0	0	0		0	0
0	54.8667	4.41	0.32	0.44	0.727273	3.02	5	3210	20.3244	30	1	0	0	0	0	0	0	0	0	0
0	59.1	4.14	0.366667	0.26	1.41026	2.67	4	3010	22.8329	25	1	0	0	0	0	0	0	0	0	0
0	67.3	2.99	0.303333	0.37	0.819819	2.29	6	3210	17.4818	28	1	0	0	0	0	0	0	0	0	0
0	26.5533	2.71333	0.38	0.4	0.95	1.61	6	3670	20.7008	26	1	0	0	0	0	0	0	0	0	0
0	71.4667	2.67	0.22	0.36	0.611111	2.17	5	4000	18.8189	31	1	0	0	0	0	0	0	0	0	0
0	28.2367	3.27	0.446667	0.34	1.31373	2.38	4	2990	19.3792	27	1	0	0	0	0	0	0	0	0	0
0	56.7	3.98333	0.31	0.38	0.815789	2.39	6	3440	19.5312	27	1	0	0	0	0	0	0	0	0	0
0	61.4	4.09667	0.313333	0.34	0.921568	2.59	5	3370	18.2857	23	1	0	0	0	0	0	0	0	0	0
0	61	4.92667	0.356667	0.21	1.69841	3.01	6	3210	22.2063	27	1	0	0	0	0	0	0	0	0	0
0	57.2	3.19333	0.32	0.29	1.10345	2.41	5	3420	23.939	29	1	0	0	0	0	0	0	0	0	0
0	62.2333	2.71	0.27	0.49	0.55102	1.7	4	3210	21.0937	22	1	0	0	0	0	0	0	0	0	0
0	7.2333	3.25667	0.693333	0.44	1.57576	2.84	5	2780	22.6757	29	1	0	0	0	0	0	1	0	0	1
0	43.4467	4.32333	0.393333	0.26	1.51282	3.4	5	2540	20.5693	30	1	0	0	1	0	0	1	0	0	0
0	72.5967	2.26	0.286667	0.34	0.843138	2.66	4	3520	19.5312	28	1	0	0	0	0	0	0	0	0	0
0	15.4033	4.39667	0.533333	0.35	1.52381	1.97	6	3060	17.1875	25	1	0	0	0	0	0	0	0	0	0
0	59.2	3.09333	0.406667	0.34	1.19608	2.29	4	2520	22.3081	27	1	0	0	0	0	0	0	0	0	0
0	44.7333	3.77	0.283333	0.33	0.858585	2.4	4	2590	18.3143	29	1	0	0	0	0	0	0	0	0	0
0	40.5	3.67	0.443333	0.33	1.34343	2.77	5	3710	25.6369	30	1	0	0	0	0	0	0	0	0	0
0	66.9367	3.48333	0.186667	0.37	0.504505	2	5	3210	25.7812	25	1	0	0	0	0	0	0	0	0	0
0	35.4667	4.9	0.62	0.34	1.82353	2.7	6	3400	22.6409	29	1	0	0	0	0	0	0	0	0	0
0	55.1	2.76667	0.263333	0.51	0.516339	3.44	5	3100	21.6311	23	1	0	0	0	0	0	0	0	0	0
0	70.3333	2.92667	0.206667	0.43	0.480621	4.09	6	3420	24.0346	33	1	0	0	0	0	0	0	0	0	0
0	28.6533	4.39667	0.493333	0.3	1.64444	3.95	5	3710	20.5693	29	1	0	0	0	0	0	1	0	0	0
0	33.15	3.10667	0.513333	0.2	2.56666	4.11	6	3230	22.5827	27	1	0	0	0	0	0	0	0	0	0
0	54.3533	5.01667	0.343333	0.28	1.22619	2.39	5	3510	20.202	27	1	0	0	0	0	0	1	0	0	0
0	14.4967	3.12333	0.483333	0.31	1.55914	4.22	6	3420	19.052	31	1	0	0	0	0	0	1	0	0	0
0	50.5667	2.54667	0.373333	0.51	0.732025	2.51	6	3210	17.5697	31	1	0	0	0	0	0	1	0	0	1
0	59.1	4.27333	0.31	0.33	0.939394	3.22	6	2570	19.052	27	1	0	0	0	0	0	1	0	0	0
0	48.5638	4.80867	0.593332	0.35	1.69523	3.01	3	2390	19.0358	23	1	0	0	0	0
0	70.1	3.74333	0.25	0.35	0.714286	2.97	5	2330	28.9062	25	1	0	0	0	0	0	1	0	0	0
0	66.6333	2.02333	0.223333	0.34	0.656862	2.8	6	2560	23.03	31	1	0	0	0	0	0	0	0	0	0
0	57.93	4.1	0.313333	0.34	0.921568	1.67	6	2660	24.6097	28	1	0	0	0	0	0	0	0	0	0
0	49.6	2.07	0.21	0.3	0.7	2.24	4	2710	23.0469	25	1	0	0	0	0	0	0	0	0	1
0	37.5	3.75	0.29	0.37	0.783784	1.85	6	2560	19.7599	27	1	0	0	0	0	0	0	0	0	0
0	73.2	2.71667	0.303333	0.38	0.798245	4.36	4	3300	20.8117	30	1	0	0	0	0	0	0	0	0	0
0	61.8267	4.07333	0.286667	0.51	0.562092	2.74	4	3200	21.5139	34	1	0	0	0	0	0	0	0	0	0
0	66.3967	2.19667	0.263333	0.52	0.50641	3.11	4	2580	21.78	27	1	0	0	0	0	0	0	0	0	0
0	67.4	5.67667	0.4	0.28	1.42857	2.48	5	2710	18.4911	30	1	0	0	0	0	0	0	0	0	0
0	67.37	2.53667	0.236667	0.24	0.986112	2.68	4	4100	20	27	1	0	0	0	0	0	0	0	0	0
0	71.1	2.51667	0.286667	0.36	0.796297	2.92	4	3210	21.9899	32	1	0	0	0	0	0	0	0	0	0
0	47.9333	4.01667	0.183333	0.31	0.591397	2.27	6	3350	21.0498	28	1	0	0	0	0	0	0	0	0	0
0	63.5333	3.27333	0.25	0.35	0.714286	3.22	4	2830	17.9089	26	1	0	0	0	0	0	0	0	0	0
0	50.2667	4.73333	0.313333	0.26	1.20513	2.92	5	4300	20.0692	30	1	0	0	0	0	0	0	0	0	0
0	61.1333	4.44667	0.346667	0.53	0.654089	2.17	6	3310	19.5312	28	1	0	0	0	0	0	1	0	0	0
0	56.4	5.54333	0.243333	0.29	0.839079	2.17	6	3410	19.7055	32	1	0	0	0	0	0	0	0	0	0
0	69.7633	2.01667	0.243333	0.56	0.434523	1.2	5	3500	25.3906	28	1	0	0	0	0	0	0	0	0	0
0	53.4467	4.04333	0.38	0.33	1.15152	2.67	4	2870	22.2137	30	1	0	0	0	0	0	0	0	0	0
0	53.1333	3.51333	0.33	0.29	1.13793	2.64	5	3490	21.2585	28	1	0	0	0	0	0	1	0	0	0
0	69.6333	4.67333	0.323333	0.28	1.15476	3.38	4	3030	16.8242	21	1	0	0	0	0	0	0	0	0	0
0	71.7	3.42667	0.356667	0.3	1.18889	1.85	5	3700	20.83	23	1	0	0	0	0	0	0	0	0	0
0	53.4333	5.66667	0.306667	0.32	0.958334	3.19	5	2780	18.1955	33	1	0	0	0	0	0	0	0	0	0
0	37.8667	2.66333	0.613333	0.38	1.61403	2.26	6	4100	21.3593	31	1	0	0	0	0	0	1	0	0	0
0	77.7667	4.26	0.35	0.58	0.603448	1.9	4	2770	17.6254	27	1	0	0	0	0	0	1	0	0	0
0	53.8333	3.24333	0.306667	0.35	0.876191	2.64	4	2660	20.2848	28	1	0	0	0	0	0	0	0	0	0
0	33.6333	5.07	0.303333	0.38	0.798245	1.9	6	2510	20.202	23	1	0	0	0	0	0	0	0	0	0
0	46.8	3.19333	0.303333	0.23	1.31884	2.51	6	2910	27.9431	32	1	0	0	0	0	0	1	0	0	0
0	62.6667	2.75	0.47	0.63	0.746032	2.35	5	2890	23.0732	33	1	0	0	0	0	0	1	0	0	0
0	62.0333	3.66	0.26	0.25	1.04	3.37	3	3010	19.2336	25	1	0	0	0	0	0	0	0	0	0
0	39.1667	4.53667	0.47	0.48	0.979167	2.16	4	3100	25.0865	23	1	0	0	0	0	0	0	0	0	0
0	62.2	3.27333	0.3	0.37	0.810811	3	6	3830	22.3081	34	1	0	0	0	0	0	0	0	0	0
0	60.3333	3.15	0.213333	0.36	0.592592	2.05	5	3270	17.2888	35	1	0	0	0	0	0	0	0	0	0
0	65.3233	2.20333	0.27	0.38	0.710526	2	6	3880	20.1951	27	1	0	0	0	0	0	1	0	0	0
0	52.5975	5.73667	0.303333	0.34	0.892156	2.19	5	3400	25.2595	23	1	0	0	0	0	0	0	0	0	0
0	55.6233	4.75667	0.443333	0.38	1.16667	3.86	4	3320	20.0288	29	1	0	0	0	0	0	0	0	0	0
0	68.7333	2.51667	0.243333	0.37	0.657657	2.47	5	2450	38.0548	28	1	0	0	0	0	0	0	0	0	0
0	77.7667	2.9	0.186667	0.5	0.373334	3.59	6	2670	22.0386	37	1	0	0	0	0	0	1	0	0	0
0	60.5333	1.89	0.493333	0.52	0.948717	3	5	3210	19.052	32	1	0	0	0	0	0	0	0	0	1
0	67.2	3.02333	0.34	0.32	1.0625	1.61	4	3460	20.1172	34	1	0	0	0	0	0	0	0	0	0
0	58	2.26667	0.273333	0.62	0.44086	3.24	6	3870	18.3655	33	1	0	0	0	0	0	1	0	0	0
0	57.56	3.53667	0.313333	0.27	1.16049	2.11	4	2430	21.1927	27	1	0	0	0	0	0	1	0	0	0
0	56.1067	2.16333	0.3	0.27	1.11111	1.65	4	3570	24.3911	32	1	0	0	0	0	0	0	0	0	0
0	46.8948	2.73892	0.387665	0.35	1.27424	3.37	6	3253	27.6019	27	1	0	0	0	0	0	0	0	0	0
0	71.785	3.79879	0.306959	0.24	1.28249	1.77	5	3956	15.5364	27	1	0	0	0	0	0	0	0	0	0
0	51.0785	3.68036	0.489494	0.31	0.509885	3.62	5	3356	22.376	26	1	0	0	0	0	0	0	0	0	0
0	51.8963	1.17357	0.381155	0.64	0.216693	3.22	6	3877	20.4632	37	1	0	0	0	0	0	0	0	0	0
0	73.9605	4.89659	0.299321	0.38	1.8888	2.81	5	3011	20.0837	26	1	0	0	0	0	0	0	0	0	0
0	56.5106	4.07642	0.175792	0.47	1.10877	2.98	5	2953	19.0016	33	1	0	0	0	0	0	0	0	0	0
0	32.4956	6.32322	0.296376	0.36	1.16578	2.72	6	3608	20.7229	25	1	0	0	0	0	0	0	0	0	0
0	40.5407	4.52804	0.575203	0.44	0.54592	2.26	5	3312	24.6081	33	1	0	0	0	0	0	0	0	0	0
0	43.8966	3.3539	0.304972	0.38	1.46488	2.34	4	3448	18.5627	30	1	0	0	0	0	0	0	0	0	0
0	67.1291	6.71854	0.276439	0.51	1.74423	2.15	6	3016	20.3218	26	1	0	0	0	0	0	0	0	0	0
0	55.1038	6.75466	0.430791	0.33	1.62109	3.45	4	3056	22.8356	30	1	0	0	0	0	0	0	0	0	0
0	55.6737	2.55354	0.408849	0.21	0.217674	3	5	3194	22.9438	32	1	0	0	0	0	0	0	0	0	0
0	51.6375	4.30386	0.44102	0.47	0.606166	2.5	6	3099	27.3971	32	1	0	0	0	0	0	0	0	0	0
0	42.3636	3.59836	0.334287	0.36	1.05598	1.78	5	3443	20.3568	29	1	0	0	0	1	0	0	0	0	0
0	74.9602	4.01142	0.479483	0.52	1.2927	2.8	6	2909	20.7814	27	1	0	0	0	0	0	0	0	0	0
0	57.0244	4.05341	0.241545	0.39	0.802412	1.87	5	2654	15.2635	24	1	0	0	0	0	0	0	0	0	0
0	22.7343	2.50875	0.358036	0.52	0.67807	1.98	5	3761	25.8973	26	1	0	0	0	0	0	0	0	0	0
0	59.856	4.11361	0.290108	0.41	1.10814	4.01	5	2738	23.8999	25	1	0	0	0	0	0	0	0	0	0
0	43.5191	5.63153	0.433674	0.35	0.644839	1.6	5	3211	24.7986	31	1	0	0	0	0	0	0	0	0	0
0	35.24	3.64726	0.37658	0.45	1.82485	1.96	7	2220	17.9529	27	1	0	0	0	0	0	0	0	0	0
0	47.0646	3.64847	0.47814	0.34	0.295968	2.17	5	2782	26.6249	30	1	0	0	0	0	0	0	0	0	0
0	35.8218	5.26786	0.576497	0.55	1.21839	2.16	5	4195	19.0046	31	1	0	0	0	0	0	0	0	0	0
0	39.9558	4.74914	0.377684	0.39	0.228462	1.79	6	3121	26.5718	32	1	0	0	0	0	0	0	0	0	0
0	41.4008	2.10782	0.307682	0.18	0.821999	2.45	4	3455	21.2538	34	1	0	0	0	0	0	0	0	0	0
0	26.6291	4.05446	0.277733	0.33	1.60389	1.85	6	3329	23.3743	27	1	0	0	0	0	0	0	0	0	0
0	61.7543	5.53229	0.335836	0.22	1.46062	3.52	5	2424	21.8965	28	1	0	0	0	0	0	0	0	0	0
0	52.2315	5.28518	0.355888	0.17	0.464163	2.67	5	3475	18.4926	27	1	0	0	0	0	0	0	0	0	0
0	34.2616	4.25296	0.569582	0.39	0.434037	3.18	5	2607	20.8354	33	1	0	0	0	0	0	0	0	0	0
0	67.5428	4.56539	0.246054	0.44	1.0403	1.59	5	3407	19.5671	27	1	0	0	0	0	0	0	0	0	0
0	56.0312	2.57612	0.249775	0.31	0.640756	2.57	5	2522	17.8798	29	1	0	0	0	0	0	0	1	0	0
0	45.9919	4.12869	0.320811	0.25	1.17768	2.96	5	3064	20.9002	27	1	0	0	0	0	0	0	0	0	0
0	62.5521	2.8276	0.424012	0.32	0.628521	2.65	6	3323	18.339	28	1	0	0	0	0	0	0	0	0	0
0	62.3156	3.34243	0.448223	0.23	0.381075	2.59	5	2928	21.3235	30	1	0	0	0	0	0	0	0	0	0
0	61.5288	4.78772	0.268982	0.45	0.84735	1.85	6	3012	22.0195	26	1	0	0	0	0	0	0	0	0	0
0	59.6791	2.63839	0.376272	0.44	0.533574	2.14	5	3343	23.8546	32	1	0	0	0	0	0	0	0	0	0
0	57.8046	4.09425	0.358656	0.22	1.44674	2.29	5	3411	18.4668	25	1	0	0	0	0	0	0	0	0	0
0	49.236	4.26165	0.487004	0.32	0.885034	2.02	5	3778	23.7048	31	1	0	0	0	0	0	0	0	0	0
0	45.8403	3.87438	0.476014	0.48	1.00238	3.11	5	4381	21.4041	27	1	0	0	0	0	0	0	0	0	0
0	44.8036	5.70718	0.33073	0.36	1.5629	3.81	5	3026	20.1503	26	1	0	0	0	0	0	0	0	0	0
0	40.4314	2.75718	0.367871	0.38	1.75148	3.5	6	3692	25.23	32	1	0	0	0	0	0	0	0	0	0
0	47.2045	4.44604	0.430767	0.42	0.996413	2.88	4	3398	22.2378	29	1	0	0	0	0	0	0	0	0	0
0	32.491	3.72521	0.191694	0.44	1.14906	2.5	6	3111	18.6779	29	1	0	0	0	0	0	0	0	0	0
0	80.2759	3.54693	0.330939	0.5	1.53464	2.98	5	3054	17.0305	33	1	0	0	0	0	0	0	0	0	0
0	66.9048	4.29873	0.422697	0.46	0.948396	2.02	5	2619	22.5613	31	1	0	0	0	0	0	0	0	0	0
0	34.4707	2.7592	0.308862	0.25	0.604934	2.76	4	3535	18.7829	28	1	0	0	0	0	0	0	0	0	0
0	44.4918	2.45529	0.356891	0.34	1.41021	2.7	5	3557	27.6022	26	1	0	0	0	0	0	0	0	0	0
0	43.6045	3.30462	0.360925	0.41	0.414857	0.93	7	2847	23.2605	30	1	0	0	0	0	0	0	0	0	0
0	60.9497	5.63414	0.288086	0.37	0.920422	3.91	5	2524	11.9824	28	1	0	0	0	0	0	0	0	0	0
0	48.9375	3.87527	0.26001	0.17	0.85842	1.64	5	3092	17.8737	31	1	0	0	0	0	0	0	0	0	0
0	53.6221	4.16116	0.342384	0.31	0.810767	0.74	5	3594	17.1065	25	1	0	0	0	0	0	0	0	0	0
0	49.7003	3.62055	0.327128	0.48	-0.0707879	2.58	5	3881	17.894	27	1	0	0	0	0	0	0	0	0	0
0	49.501	4.30537	0.449569	0.4	0.785415	2.65	4	2822	15.724	38	1	0	0	0	0	0	0	0	0	0
0	69.1399	2.83047	0.521698	0.24	1.51774	2.57	6	3023	23.1791	33	1	0	0	0	1	0	0	0	0	0
0	46.9561	5.01827	0.361867	0.4	0.832056	2.68	4	3869	22.6836	25	1	0	0	0	0	0	0	0	0	0
0	71.1973	4.42382	0.404431	0.36	0.772714	1.75	4	2893	22.8498	27	1	0	0	0	0	0	0	0	0	0
0	28.5484	2.98108	0.355803	0.45	0.754103	2.99	5	2613	25.2492	28	1	0	0	0	0	0	0	0	0	0
0	58.2317	3.87401	0.425443	0.59	0.671672	3.55	5	3239	21.2666	26	1	0	0	0	0	0	0	0	0	0
0	51.8207	4.56032	0.385753	0.23	1.07504	1.99	6	4175	26.3321	31	1	0	0	0	0	0	0	0	0	0
0	53.102	4.39584	0.38763	0.33	1.25158	2.79	5	2732	17.5114	30	1	0	0	0	0	0	0	0	0	0
0	55.3797	5.35431	0.478473	0.37	1.58981	2.39	5	2860	19.0324	34	1	0	0	0	0	0	0	0	0	0
0	43.1082	3.18172	0.260742	0.17	0.398475	2.54	5	3031	18.7144	28	1	0	0	0	0	0	0	0	0	0
0	45.4613	4.97495	0.513195	0.38	1.17357	3.26	6	3106	20.0893	32	1	0	0	0	0	0	0	0	0	0
0	35.9252	4.89241	0.399294	0.32	0.956784	2.77	6	2899	18.2814	30	1	0	0	0	0	0	0	0	0	0
0	35.1848	3.64893	0.381848	0.6	1.13007	3.93	4	3299	23.5985	24	1	0	0	0	0	0	0	0	0	0
0	54.3207	2.80532	0.305026	0.09	0.60964	2.35	5	2776	20.9478	24	1	0	0	0	0	0	0	0	0	0
0	56.3338	2.68791	0.346115	0.53	1.03532	3.62	4	3016	25.2063	29	1	0	0	0	0	0	0	0	0	0
0	50.8349	4.29219	0.401841	0.48	0.561471	2.26	4	3390	16.1433	23	1	0	0	0	0	0	0	0	0	0
0	62.9297	3.74367	0.149169	0.45	1.27803	2.42	5	3139	16.1249	26	1	0	0	0	0	0	0	0	0	0
0	78.6219	5.6625	0.300746	0.39	0.643437	2.35	4	3397	19.0539	31	1	0	0	0	0	0	0	0	0	0
0	43.2653	4.37241	0.42385	0.31	1.04245	2.78	5	2437	18.3864	31	1	0	0	0	0	0	0	0	0	0
0	17.9681	3.4317	0.332576	0.49	0.176733	2.91	5	2696	16.1606	27	1	0	0	0	0	0	0	0	0	0
0	64.0911	2.75387	0.280116	0.29	1.14654	2.68	5	3007	22.737	29	1	0	0	0	0	0	0	0	0	0
0	40.2298	3.21344	0.297204	0.45	1.45507	3	6	2352	23.6904	25	1	0	0	0	0	0	0	0	0	0
0	40.5246	4.17303	0.387542	0.42	1.3201	2.03	6	3166	25.9193	28	1	0	0	0	0	0	0	1	0	0
0	64.3671	3.34978	0.193628	0.49	1.43371	2.41	3	3503	23.1478	32	1	0	0	0	0	0	0	0	0	0
0	46.1352	4.35073	0.453419	0.32	0.481518	3.04	5	3018	22.8707	33	1	0	0	0	0	0	0	0	0	0
0	33.1126	3.4707	0.138261	0.32	0.950435	3.31	5	2322	25.8703	25	1	0	0	0	0	0	0	0	0	0
0	52.6201	3.70796	0.310924	0.41	0.989794	2.82	6	2964	20.0507	28	1	0	0	0	0	0	0	0	0	0
0	48.1649	3.05984	0.2815	0.41	1.30193	3.08	5	2479	21.8268	28	1	0	0	0	0	0	0	0	0	0
0	50.1777	5.79311	0.233667	0.52	0.951036	3.17	5	2956	22.3825	29	1	0	0	0	0	0	0	0	0	0
0	55.4582	4.16239	0.251362	0.43	0.937008	3.01	6	2432	29.5429	25	1	0	0	0	0	0	0	0	0	0
0	44.9402	4.05662	0.389027	0.39	1.68047	2.42	5	2136	22.8662	29	1	0	0	0	0	0	0	0	0	0
0	59.0632	2.06285	0.350687	0.46	1.44843	2.46	7	3471	18.6884	30	1	0	0	0	0	0	0	0	0	0
0	47.0296	4.50169	0.331915	0.33	0.323255	3.01	3	3198	22.9935	34	1	0	0	0	0	0	0	0	0	0
0	54.7138	2.75586	0.122522	0.49	0.865353	2.26	7	2542	17.4493	25	1	0	0	0	0	0	0	0	0	0
0	65.3587	2.89286	0.225818	0.28	0.625272	2.49	3	2427	17.5555	30	1	0	0	0	0	0	0	0	0	0
0	56.1525	4.76982	0.349491	0.41	2.1916	2.51	6	2512	25.549	28	1	0	0	0	0	0	0	0	0	0
0	45.5625	3.34795	0.272082	0.21	0.821994	1.46	6	2831	17.357	23	1	0	0	0	0	0	0	0	0	0
0	66.0817	2.00424	0.280506	0.4	1.471	2.81	5	3632	16.004	35	1	0	0	0	0	0	0	0	0	0
0	63.9209	5.65296	0.471903	0.23	1.05538	2.98	5	3253	19.772	26	1	0	0	0	0	0	0	0	0	0
0	57.7277	1.35188	0.381305	0.36	1.06034	2.54	5	2637	19.2136	27	1	0	0	0	0	0	0	0	0	0
0	53.4191	4.41148	0.254893	0.21	1.21304	3.84	5	3529	22.4647	28	1	0	0	0	0	0	0	0	0	0
0	41.3609	4.8724	0.314516	0.32	0.960969	2.46	5	2437	20.5638	30	1	0	0	0	0	0	0	0	0	0
0	69.0293	3.16307	0.333568	0.3	1.34648	2.98	6	3852	30.4836	29	1	0	0	0	0	0	0	0	0	0
0	41.7456	4.27819	0.29258	0.43	1.23856	2.95	5	2963	25.9708	24	1	0	0	0	0	0	0	0	0	0
0	80.5316	4.27285	0.263165	0.32	0.351449	3.13	3	3739	14.5317	26	1	0	0	0	0	0	0	0	0	0
0	71.4219	4.89664	0.357733	0.31	0.797779	2.87	5	2610	22.4857	31	1	0	0	0	0	0	0	0	0	0
0	46.818	4.31948	0.439939	0.5	0.810527	2.44	5	3064	19.9744	26	1	0	0	0	0	0	0	0	0	1
0	35.816	3.56347	0.386619	0.54	0.817343	2.97	6	2843	24.0534	29	1	0	0	0	0	0	0	0	0	0
0	40.213	4.76739	0.342355	0.49	1.4383	2.76	4	3236	17.8957	29	1	0	0	0	0	0	0	0	0	0
0	53.6717	4.64774	0.403306	0.23	1.60496	2.75	5	2631	19.601	32	1	0	0	0	0	0	0	0	0	0
0	46.665	2.84614	0.445404	0.51	0.653075	3.08	4	2514	21.6307	31	1	0	0	0	0	0	0	0	0	0
0	45.2618	2.36471	0.348537	0.26	1.23129	3.12	4	2640	22.796	30	1	0	0	0	0	0	0	0	0	0
0	36.8568	3.98365	0.410354	0.37	0.555088	2.57	4	3893	15.7007	32	1	0	0	0	0	0	0	0	0	0
0	49.4709	3.53331	0.244347	0.45	0.797199	2.31	5	3189	20.0387	30	1	0	0	0	0	0	0	0	0	0
0	39.1764	2.79536	0.337223	0.36	1.13528	3.51	3	3553	14.3764	26	1	0	0	0	0	0	0	0	0	0
0	26.89	3.90448	0.319533	0.37	0.942681	2.62	6	2727	23.2463	28	1	0	0	0	0	0	0	0	0	0
0	44.8071	2.4485	0.383386	0.39	0.748448	2.31	5	3027	19.1014	27	1	0	0	0	0	0	0	0	0	0
0	62.8842	3.98464	0.400144	0.42	0.520439	1.91	5	3036	26.1328	26	1	0	0	0	0	0	0	0	0	0
0	42.0922	3.16934	0.350288	0.42	0.894138	2.77	6	2951	25.45	33	1	0	0	0	0	0	0	0	0	0
0	58.5565	4.81008	0.283674	0.21	1.03808	2.85	5	3014	18.7014	32	1	0	0	0	0	0	0	0	0	0
0	27.5865	6.33181	0.266724	0.36	1.23951	1.78	5	3215	22.5985	30	1	0	0	1	0	0	0	0	0	0
0	49.3244	2.86749	0.391976	0.41	0.671246	1.63	5	2713	25.41	29	1	0	0	0	0	0	0	0	0	0
0	57.3244	4.91431	0.503759	0.44	1.2492	2.71	4	3434	22.9779	29	1	0	0	0	0	0	0	0	0	0
0	54.2876	4.67318	0.281505	0.35	0.55743	2	6	3906	17.5722	27	1	0	0	0	0	0	0	0	0	0
0	51.5678	3.74464	0.323213	0.31	0.801533	3.52	5	3051	14.6019	30	1	0	0	0	0	0	0	0	0	0
0	41.1828	3.34697	0.397383	0.25	1.19531	1.8	5	3318	22.2308	24	1	0	0	0	0	0	0	0	0	0
0	38.2748	5.45115	0.305608	0.31	0.74368	1.49	4	3175	18.9172	25	1	0	0	0	0	0	0	0	0	0
0	35.8479	1.73762	0.375706	0.37	0.709269	2.53	5	3061	26.1064	31	1	0	0	0	0	0	0	0	0	0
0	51.7344	3.15039	0.358169	0.32	0.998633	2.91	3	3285	18.5677	26	1	0	0	0	0	0	0	0	0	0
0	36.9145	2.32732	0.282633	0.44	1.03134	2.69	4	3052	23.6236	31	1	0	0	0	0	0	0	0	0	0
0	43.2719	5.26448	0.449294	0.42	1.38661	2.49	4	2677	24.6061	29	1	0	0	0	0	0	0	0	0	0
0	46.5342	3.61966	0.450835	0.22	0.925111	2.84	5	3037	24.1243	29	1	0	0	0	0	0	0	0	0	0
0	75.7526	3.27331	0.46927	0.41	0.345248	2.04	4	3640	15.5864	28	1	0	0	0	0	0	0	0	0	0
0	41.0263	7.11953	0.494549	0.43	0.758174	2.74	5	3341	16.3254	27	1	0	0	0	0	0	0	0	0	0
0	53.3726	3.76554	0.310611	0.35	0.768198	1.99	5	3261	19.6944	34	1	0	0	0	0	0	0	0	0	0
0	51.1822	3.35723	0.314953	0.38	0.648915	2.01	5	3026	24.9701	27	1	0	0	0	0	0	0	0	0	0
0	36.7144	4.12842	0.390182	0.34	1.14454	2.65	4	3333	25.6579	36	1	0	0	0	0	0	0	0	0	0
0	49.1053	2.19086	0.42842	0.35	2.00594	2.87	5	2142	27.7733	29	1	0	0	0	0	0	0	0	1	0
0	70.1967	4.32591	0.327896	0.28	1.33116	1.97	6	3047	18.194	29	1	0	0	0	0	0	0	0	0	0
0	56.3796	3.71771	0.319217	0.42	0.95615	1.49	5	2388	19.1431	31	1	0	0	0	0	0	0	0	0	0
0	50.6712	4.30333	0.29901	0.26	1.21637	1.86	5	2891	21.3042	31	1	0	0	0	0	0	0	0	0	0
0	44.2189	2.79864	0.516755	0.32	1.58747	1.17	3	2433	25.6732	24	1	0	0	0	0	0	0	0	0	0
0	21.529	2.75652	0.103095	0.29	0.895126	2.67	5	3663	14.8106	28	1	0	0	0	0	0	0	0	0	0
0	65.8387	3.09831	0.345731	0.3	1.27991	2.99	3	2761	17.1853	29	1	0	0	0	0	0	0	0	0	0
0	29.7744	3.02097	0.367064	0.34	1.23938	3.84	7	2853	27.3994	25	1	0	0	0	0	0	0	0	0	0
0	60.3929	5.16465	0.253259	0.33	0.968876	1.95	5	3648	24.0825	25	1	0	0	0	0	0	0	0	0	0
0	76.6604	5.45513	0.403058	0.31	1.03968	2.25	6	3453	14.0483	27	1	0	0	0	0	0	0	0	0	0
0	30.0074	3.65473	0.159185	0.36	1.27494	2.5	5	2920	25.0762	30	1	0	0	0	0	0	0	0	0	0
0	59.8619	3.44519	0.462099	0.22	1.00697	2.75	7	2147	22.7144	27	1	0	0	0	0	0	0	0	0	0
0	46.4493	3.4762	0.190671	0.39	0.883175	2.02	4	3464	18.9858	26	1	0	0	0	0	0	0	0	0	0
0	28.2229	3.88924	0.134757	0.44	0.782614	3.23	6	2906	21.3685	24	1	0	0	0	0	0	0	0	0	0
0	29.0227	3.91793	0.283948	0.25	1.13231	2.31	5	2753	23.5736	23	1	0	0	0	0	0	0	0	0	0
0	27.814	4.11822	0.379905	0.24	0.995594	3.27	6	2830	22.5998	31	1	0	0	0	0	1	0	0	0	0
0	42.7105	3.04307	0.295558	0.6	0.87044	1.44	4	2562	24.1227	31	1	0	0	0	0	0	0	0	0	0
0	29.7589	2.93914	0.305125	0.4	1.08712	2.46	7	2424	26.6704	25	1	0	0	0	0	0	0	0	0	0
0	59.669	5.05889	0.397645	0.39	0.711849	2.82	5	2612	22.7289	25	1	0	0	0	0	0	0	0	0	0
0	79.318	3.24847	0.253332	0.36	0.70025	2.23	5	3578	16.2993	29	1	0	0	0	0	0	0	0	0	0
0	32.19	4.13171	0.354203	0.43	1.56012	2.24	4	2596	21.5997	35	1	0	0	0	0	0	0	0	0	0
0	61.0579	3.75835	0.414721	0.38	0.669057	2.13	4	2929	13.2229	34	1	0	0	0	0	0	0	0	0	0
0	60.7978	2.82407	0.53249	0.33	1.14212	2.65	4	3320	20.5541	28	1	0	0	0	0	0	0	0	0	0
0	54.7197	4.43041	0.412805	0.34	0.634666	3.46	4	3284	18.6418	26	1	0	0	0	0	0	0	0	0	0
0	36.0671	3.99696	0.540863	0.35	0.926208	1.86	5	2180	18.2073	35	1	0	0	0	0	0	0	0	0	0
0	48.4354	5.26911	0.41008	0.35	1.17159	2.51	6	3753	19.2735	33	1	0	0	0	0	0	0	0	0	0
0	46.1961	3.93925	0.362767	0.31	0.618405	2.24	5	3160	34.6124	24	1	0	0	0	0	0	0	0	0	1
0	57.9308	3.4736	0.12918	0.49	1.25247	3.57	3	3539	17.9522	25	1	0	0	0	0	0	0	0	0	0
0	44.9154	4.10605	0.236149	0.39	1.10384	3.93	5	2646	18.2547	31	1	0	0	0	0	0	0	0	0	0
0	63.6909	2.58789	0.330038	0.3	0.892226	2.93	6	2872	20.0784	28	1	0	0	0	0	0	0	0	0	0
0	44.8856	2.95055	0.43694	0.44	1.11434	2.62	6	2954	20.0683	21	1	0	0	0	0	0	0	0	0	0
0	64.7447	4.34663	0.32967	0.41	1.04699	3.54	7	3379	33.0663	29	1	0	0	0	0	0	0	0	0	0
0	35.4994	3.47196	0.41946	0.37	0.685538	2.25	5	2515	21.2985	34	1	0	0	0	0	0	0	0	0	0
0	32.5639	3.74903	0.252823	0.42	0.465269	2.54	2	2857	20.8731	29	1	0	0	0	0	0	0	0	0	0
0	95.1927	3.69794	0.334685	0.29	1.05928	3.32	6	3367	19.7784	32	1	0	0	0	0	0	0	0	0	0
0	44.2974	3.1428	0.385599	0.36	0.620308	2.65	5	3583	25.2573	26	1	0	0	0	0	0	0	0	0	0
0	54.2469	1.7239	0.325847	0.28	1.00342	2.24	4	2661	20.6594	28	1	0	0	0	0	0	0	0	0	0
0	58.9546	4.1792	0.3748	0.26	0.366078	2.71	5	3730	23.0035	32	1	0	0	0	0	0	0	0	0	0
0	43.3662	4.60731	0.29357	0.35	0.650217	2.26	5	3017	21.7623	28	1	0	0	0	0	0	0	0	0	0
0	57.289	2.48094	0.401909	0.4	1.12486	3.89	5	2990	16.0216	29	1	0	0	0	0	0	0	0	0	0
0	55.2312	5.3548	0.3547	0.29	1.43041	2.31	5	3389	18.5999	29	1	0	0	0	0	0	0	0	0	0
0	47.1007	4.21687	0.358226	0.36	1.08423	3.24	5	3482	21.392	26	1	0	0	0	0	0	0	0	0	0
0	51.0059	5.20882	0.161082	0.2	0.624373	2.58	5	2729	25.523	26	1	0	0	0	0	0	0	0	0	0
0	49.6234	2.82478	0.293267	0.34	0.853211	3.51	4	3477	22.4593	27	1	0	0	0	0	0	0	0	0	0
0	79.7123	3.9904	0.208679	0.5	1.4495	3.23	5	2641	21.8369	26	1	0	0	0	0	0	0	0	0	0
0	39.7826	3.71371	0.196647	0.27	1.2223	2.12	6	3465	18.6208	32	1	0	0	0	0	0	0	0	0	0
0	34.848	4.61443	0.311905	0.26	1.32835	2.78	6	2834	24.5709	26	1	0	0	0	1	0	0	0	0	0
0	50.6232	3.22022	0.346434	0.36	1.4112	2.48	6	2716	24.6429	28	1	0	0	0	0	0	0	0	0	0
0	54.4174	3.80696	0.392502	0.43	1.1665	2.93	3	3567	20.2821	33	1	0	0	0	0	0	0	0	0	0
0	56.1712	1.97283	0.476228	0.5	1.45572	2.55	5	3295	24.0428	27	1	0	0	0	0	0	0	0	0	0
0	43.7198	3.01098	0.409172	0.64	0.632758	2.91	4	2517	20.5577	26	1	0	0	0	0	0	0	0	0	0
0	35.3025	3.9471	0.468019	0.46	1.13575	2.5	6	3480	22.1193	29	1	0	0	0	0	0	0	0	0	0
0	67.6732	3.08493	0.308543	0.45	0.883186	3.25	5	2955	24.2256	29	1	0	0	0	0	0	0	0	0	0
0	45.2325	3.77225	0.331191	0.58	1.09706	2.8	4	3341	23.3232	29	1	0	0	0	0	0	0	0	0	0
0	38.0549	3.33216	0.475597	0.35	1.54109	1.66	5	3289	18.8023	26	1	0	0	0	0	0	0	0	0	0
0	46.8099	4.44687	0.363228	0.36	1.21642	2.56	6	2631	22.6879	27	1	0	0	0	0	0	0	0	0	0
0	47.354	5.02924	0.188921	0.41	0.768528	2.34	5	3025	19.5833	31	1	0	0	0	0	0	0	0	0	0
0	65.5407	2.96444	0.275345	0.24	0.878969	3.36	4	3068	20.7332	20	1	0	0	0	0	0	0	0	0	0
0	51.2765	3.49901	0.467555	0.2	0.641403	1.77	6	2878	18.2876	33	1	0	0	0	0	0	0	0	0	0
0	60.5892	5.31057	0.299791	0.56	0.981845	1.14	6	2159	21.3054	30	1	0	0	0	0	0	0	0	0	0
0	43.1504	1.53699	0.397669	0.32	0.819914	2.91	5	2844	24.3864	24	1	0	0	0	0	0	0	0	0	0
0	53.0812	3.48574	0.364577	0.34	1.33014	3.24	6	3305	20.3142	23	1	0	0	0	0	0	0	0	0	0
0	45.5798	5.95869	0.311648	0.28	0.822629	2.9	5	3524	23.8651	26	1	0	0	0	0	0	0	0	0	0
0	51.4135	6.09235	0.326739	0.39	1.29803	3.53	4	3607	21.0347	32	1	0	0	0	0	0	0	0	0	0
0	37.6395	3.97983	0.403711	0.44	1.30214	3.21	5	3408	23.3094	30	1	0	0	0	0	0	0	0	0	0
0	31.8592	2.92181	0.384829	0.36	0.84531	1.93	5	2985	16.0465	28	1	0	0	0	0	0	0	0	0	0
0	77.8863	3.98903	0.491095	0.38	1.58103	3.23	6	2919	23.828	29	1	0	0	0	0	0	0	0	1	0
0	58.4556	3.14046	0.342389	0.47	1.02798	2.17	5	2811	19.1486	33	1	0	0	0	0	0	0	0	0	0
0	32.6875	5.32411	0.267399	0.38	0.759367	3.35	6	3511	19.8824	28	1	0	0	0	0	0	0	0	0	0
0	41.5938	2.98105	0.380301	0.33	1.04674	3.28	5	2800	22.2793	28	1	0	0	0	0	0	0	0	0	0
0	33.6029	4.20417	0.436221	0.37	0.625745	2.54	6	3172	23.0774	28	1	0	0	0	0	0	0	0	0	0
0	80.6913	4.46026	0.599662	0.3	1.27459	3.33	6	3507	19.686	28	1	0	0	0	0	0	0	0	0	0
0	68.3581	3.03184	0.315035	0.39	0.663599	2.39	5	3244	17.8416	23	1	0	0	0	0	0	0	0	0	0
0	46.4083	4.70053	0.329272	0.29	1.52828	3.29	4	3165	19.0035	28	1	0	0	0	0	0	0	0	0	0
0	57.6553	3.04177	0.454586	0.52	0.197687	0.96	5	2885	17.0344	36	1	0	0	0	0	0	0	0	0	0
0	44.3324	4.47104	0.495927	0.14	0.577734	1.84	4	2541	25.2484	28	1	0	0	0	0	0	0	0	0	0
0	43.471	4.95475	0.294821	0.42	0.883635	2.68	5	2951	22.6971	31	1	0	0	0	0	0	0	0	0	0
0	39.125	2.79234	0.431995	0.33	0.740447	2.22	6	2684	21.3462	28	1	0	0	0	0	0	0	0	0	0
0	41.8241	4.96651	0.304516	0.58	1.5496	0.71	4	3143	17.8288	33	1	0	0	0	0	0	0	0	0	0
0	73.0679	3.30975	0.263359	0.36	0.993459	1.99	4	3093	24.3427	31	1	0	0	0	0	0	0	0	0	0
0	49.3457	4.1227	0.427723	0.43	1.15754	3.71	4	2923	22.0411	28	1	0	0	0	0	0	0	0	0	0
0	51.7566	4.02675	0.374143	0.42	1.29686	1.73	5	3346	15.4564	28	1	0	0	0	0	0	0	0	0	0
0	53.4881	3.3744	0.403463	0.4	1.07775	2.7	6	3749	20.0557	27	1	0	0	0	0	0	0	0	0	0
0	67.2459	4.09548	0.302925	0.43	1.39709	2.23	5	3104	20.2924	26	1	0	0	0	0	0	0	0	0	0
0	42.917	2.54138	0.549179	0.58	1.1911	2.59	5	3328	20.2735	30	1	0	0	0	0	1	0	0	0	0
0	36.2879	3.67625	0.43207	0.47	1.29325	2.45	5	2605	21.4914	29	1	0	0	0	0	0	0	0	0	0
0	73.4128	4.67384	0.324291	0.4	0.430121	2.48	4	3032	22.7364	32	1	0	0	0	0	0	0	0	0	0
0	43.9592	1.5627	0.435953	0.56	0.572256	2.49	6	3093	25.4973	27	1	0	0	0	0	0	0	0	0	0
0	40.0368	2.27434	0.237201	0.44	0.137543	1.05	5	3290	20.9977	24	1	0	0	0	0	0	0	0	0	0
0	32.8962	2.61242	0.348823	0.44	0.917253	2.58	6	3256	19.2226	23	1	0	0	0	0	0	0	0	0	0
0	32.2222	2.16943	0.508582	0.5	1.58311	2.67	6	3159	17.3068	21	1	0	0	0	0	0	0	0	0	0
0	42.1113	4.25257	0.343527	0.4	0.630708	2.87	6	3259	22.5417	31	1	0	0	0	0	0	0	0	0	0
0	58.696	2.78769	0.457489	0.45	1.14184	3.54	4	2670	19.9187	29	1	0	0	0	0	0	0	0	0	0
0	65.5397	1.57264	0.340097	0.35	1.19159	2.6	4	3166	23.4897	31	1	0	0	0	0	0	0	0	0	0
0	59.9427	3.15623	0.124879	0.39	1.11159	2.77	5	2328	18.3966	32	1	0	0	0	0	0	0	0	0	0
0	45.0376	3.41232	0.271856	0.38	0.905022	1.58	5	3498	20.374	27	1	0	0	0	0	0	0	0	0	0
0	50.9288	4.70598	0.386193	0.32	0.773069	2.65	5	3394	17.065	34	1	0	0	0	0	0	0	0	0	0
0	40.2938	2.67276	0.513059	0.58	0.76571	1.49	5	3056	23.294	35	1	0	0	0	0	0	0	0	0	0
0	40.1182	5.02178	0.301588	0.33	1.02423	3.98	6	3857	20.6855	29	1	0	0	0	0	0	0	0	0	0
0	62.4063	4.23057	0.391712	0.35	1.53091	2.33	5	2826	30.9949	28	1	0	0	0	0	0	0	0	0	0
0	35.9667	4.19322	0.263085	0.51	0.703772	2.83	5	3665	19.884	31	1	0	0	0	0	0	0	0	0	0
0	77.303	2.9333	0.257732	0.38	0.968916	2.89	6	3402	18.5947	32	1	0	0	0	0	0	0	0	0	0
0	48.8408	5.84353	0.282523	0.5	1.05656	1.66	5	4088	28.1348	33	1	0	0	0	0	0	0	0	0	0
0	53.0825	3.64707	0.505026	0.32	1.33007	2.91	5	3664	28.016	31	1	0	0	0	0	0	0	0	0	0
0	39.8217	1.92488	0.46058	0.38	0.925924	1.83	4	3430	26.6609	28	1	0	0	0	0	0	0	0	0	0
0	42.1055	3.60602	0.424645	0.36	1.26934	2.9	6	3347	22.4877	30	1	0	0	0	0	0	0	0	0	0
0	31.7727	1.81127	0.478737	0.29	0.425883	2.14	6	3325	23.9168	27	1	0	0	0	0	0	0	0	0	0
0	47.5523	3.49541	0.319105	0.35	1.30122	2.1	6	3477	24.5736	26	1	0	0	0	0	0	0	0	0	0
0	55.9271	3.37955	0.441844	0.32	1.05542	2.87	4	3430	25.2623	24	1	0	0	0	0	0	0	0	0	0
0	54.6098	4.52454	0.384834	0.46	0.584378	2.84	6	3632	19.1009	24	1	0	0	0	0	0	0	0	0	0
0	39.2233	4.86436	0.254348	0.35	0.0964649	2.4	5	3014	18.6697	27	1	0	0	0	0	0	0	0	0	0
0	39.1247	3.06441	0.276951	0.37	0.872969	2.06	7	3895	25.1263	30	1	0	0	0	0	0	0	0	1	0
0	43.11	4.65343	0.368292	0.3	1.28165	2.71	5	3067	17.3556	32	1	0	0	0	0	0	0	0	0	0
0	70.9134	5.29456	0.384419	0.4	1.14342	2.54	5	2476	22.7247	29	1	0	0	0	0	0	0	0	0	0
0	34.2732	3.00422	0.329789	0.22	0.873432	3.25	7	3667	18.8636	28	1	0	0	0	0	0	0	0	0	0
0	47.6062	3.14084	0.259802	0.09	1.03712	2.13	6	2422	28.4259	23	1	0	0	0	0	0	0	0	0	0
0	76.5666	4.49234	0.146351	0.57	1.07898	2.49	5	3096	24.7377	28	1	0	0	0	0	0	0	0	0	0
0	48.6925	4.00727	0.407185	0.45	0.720012	4.17	4	2687	23.2017	26	1	0	0	0	0	0	0	0	0	0
0	31.1769	4.38655	0.332494	0.44	1.03889	1.68	6	3681	22.0624	25	1	0	0	0	0	0	0	0	0	0
0	40.848	5.2742	0.420032	0.16	1.0617	2.8	6	3385	18.6061	25	1	0	0	0	0	0	0	0	0	0
0	56.852	4.21887	0.202848	0.45	0.7317	2.87	5	2764	19.7446	27	1	0	0	0	0	0	0	0	0	0
0	44.8714	4.90813	0.233176	0.43	1.09566	2.26	5	3570	21.7258	28	1	0	0	0	0	0	0	0	0	0
0	42.2796	4.46343	0.351562	0.37	1.14006	2.08	5	3179	22.1537	32	1	0	0	0	0	0	0	0	0	0
0	45.3123	4.26713	0.216644	0.46	1.22532	1.56	4	3400	22.5098	36	1	0	0	0	0	0	0	0	0	0
0	51.3566	4.21783	0.157541	0.49	1.29832	1.58	6	3499	12.4478	30	1	0	0	0	0	0	0	0	0	0
0	72.3388	5.15663	0.444334	0.37	1.17948	2.39	4	2845	22.6042	28	1	0	0	0	0	0	0	0	0	0
0	48.8652	2.77802	0.456491	0.57	1.13644	3.46	5	3202	23.4005	34	1	0	0	0	0	0	0	0	0	0
0	65.1355	2.67128	0.256332	0.48	0.979626	2.62	4	1913	25.1771	31	1	0	0	0	0	0	0	0	0	0
0	58.8736	4.43133	0.3349	0.5	1.19467	3.66	6	2916	26.7648	29	1	0	0	0	0	0	0	0	0	0
0	48.5163	3.69331	0.24555	0.35	0.515778	2.16	6	3469	24.4025	33	1	0	0	0	0	0	0	0	0	0
0	28.7689	3.89418	0.395905	0.37	1.27588	2.98	7	3548	24.8752	24	1	0	0	0	0	0	0	0	0	0
0	42.8467	4.58619	0.360026	0.29	0.80596	2.67	4	3353	19.9373	30	1	0	0	0	0	0	0	0	0	0
0	43.2815	4.59866	0.272971	0.42	1.94104	2.83	6	3192	19.5091	29	1	0	0	0	0	0	0	0	0	0
0	50.7535	3.54502	0.282844	0.41	0.781686	2.72	5	3424	18.4152	32	1	0	0	0	0	0	0	0	0	0
0	68.1882	3.4933	0.253003	0.39	-0.123748	3.12	5	2650	27.0036	26	1	0	0	0	0	0	0	0	0	0
0	82.0029	3.89376	0.40834	0.31	1.55953	2.57	5	2767	14.3574	27	1	0	0	0	0	0	0	0	0	0
0	71.6302	4.91986	0.422296	0.36	0.780771	3.26	5	2658	22.2704	32	1	0	0	0	0	0	0	0	0	0
0	48.2448	4.25925	0.40213	0.58	1.25165	2.92	4	3241	21.5255	30	1	0	0	0	0	0	0	0	0	0
0	25.6575	5.30357	0.275725	0.29	1.10654	2.57	4	3107	22.9137	26	1	0	0	0	0	0	0	0	0	0
0	44.688	3.80951	0.17794	0.34	1.45056	2.5	6	3260	24.2778	26	1	0	0	0	0	0	0	0	0	0
0	51.3387	4.98484	0.418136	0.24	0.660399	1.68	3	3259	16.7097	26	1	0	0	0	0	0	0	0	0	0
0	61.8548	4.73317	0.344748	0.26	0.547463	2.12	5	3614	24.1345	30	1	0	0	0	0	0	0	0	0	0
0	63.4899	4.45221	0.359019	0.35	1.43817	2.39	5	3882	22.7693	31	1	0	0	0	0	0	0	0	0	0
0	59.6188	4.24751	0.470098	0.34	0.638546	3.23	6	2475	21.1662	25	1	0	0	0	0	0	0	0	0	0
0	30.6839	3.52717	0.270477	0.32	0.411277	3.13	5	3279	19.8348	31	1	0	0	0	0	0	0	0	0	0
0	61.9192	3.70435	0.481697	0.3	1.32476	2.01	4	2798	22.7341	30	1	0	0	0	0	0	0	0	0	0
0	43.8841	4.05533	0.32027	0.36	0.991549	2.24	6	3729	18.7959	29	1	0	0	0	0	0	0	0	0	0
0	52.5296	3.86814	0.28917	0.49	1.9176	3.8	6	3401	22.7623	29	1	0	0	0	0	0	0	0	0	0
0	51.1347	4.79563	0.341774	0.35	1.15312	1.59	6	3628	21.4181	27	1	0	0	0	0	0	0	0	0	0
0	56.0549	3.70406	0.403534	0.25	0.877808	2.7	4	2508	15.6956	22	1	0	0	0	0	0	0	0	0	0
0	50.4408	3.74445	0.341622	0.28	0.769497	2.77	7	3116	27.3462	27	1	0	0	0	0	0	0	0	0	0
0	26.8965	3.31516	0.269752	0.18	1.68303	2.23	6	3822	28.5758	24	1	0	0	0	0	0	0	0	0	0
0	60.3449	3.67397	0.333908	0.21	0.537242	1.62	6	2679	25.0447	29	1	0	0	0	0	0	0	0	0	0
0	55.4685	3.74612	0.0995943	0.31	1.26114	2.3	4	2619	19.9672	23	1	0	0	0	0	0	0	0	0	0
0	46.4012	1.41792	0.310388	0.28	1.23929	4.46	5	3012	19.3636	29	1	0	0	0	0	0	0	0	0	0
0	51.7413	2.402	0.410371	0.27	0.790985	2.5	5	2770	25.1335	36	1	0	0	0	0	0	0	0	0	0
0	51.9624	3.74226	0.345557	0.58	1.6242	2.42	4	3463	24.6202	32	1	0	0	0	0	0	0	0	0	0
0	53.1727	3.54231	0.434458	0.55	0.721891	2.7	5	2884	25.1573	32	1	0	0	0	0	0	0	0	0	0
0	72.9279	2.57204	0.413482	0.63	1.00964	1.76	6	2982	20.4688	28	1	0	0	0	0	0	0	0	0	0
0	47.0496	1.75206	0.430034	0.46	1.17051	3.11	5	2456	25.3423	27	1	0	0	0	0	0	0	0	0	0
0	52.4359	3.44993	0.431112	0.36	1.93535	3.08	5	3242	27.52	24	1	0	0	0	0	0	0	0	0	0
0	66.3541	4.49516	0.182873	0.28	1.26042	2.33	6	3389	21.9615	31	1	0	0	0	0	0	0	0	0	0
0	64.7651	5.65642	0.363534	0.27	1.70158	2.62	4	2486	22.0261	31	1	0	0	0	0	0	0	0	0	0
0	66.0324	3.77755	0.532083	0.33	0.729436	2.22	6	3747	21.5099	31	1	0	0	0	0	0	0	0	0	0
0	42.0627	5.36598	0.313294	0.51	0.327603	3.06	6	2650	17.3367	27	1	0	0	0	0	0	0	0	0	0
0	77.9596	3.90353	0.410043	0.45	1.36878	1.41	4	3289	17.4072	28	1	0	0	0	0	0	0	0	0	0
0	51.0255	3.93725	0.377968	0.47	0.373826	2.42	3	3159	19.3805	24	1	0	0	0	0	0	0	0	0	0
0	76.0725	4.1543	0.420845	0.36	0.486945	3.02	6	2675	22.9799	29	1	0	0	0	0	0	0	0	0	0
0	31.3012	2.91458	0.334903	0.23	1.25869	3.76	5	2824	22.2913	26	1	0	0	0	0	0	0	0	0	0
0	50.3894	3.7638	0.295897	0.41	0.995296	1.94	7	3516	25.5756	24	1	0	0	0	0	0	0	0	0	0
0	67.4885	4.75956	0.370563	0.36	1.35205	1.79	5	3048	18.3264	25	1	0	0	0	0	0	0	0	0	0
0	40.1457	3.03991	0.384646	0.35	1.58367	2.5	5	3004	21.0126	28	1	0	0	0	0	0	0	0	0	0
0	39.6247	3.4839	0.34389	0.59	1.37802	2.54	4	3507	19.7607	29	1	0	0	0	0	0	0	0	0	0
0	37.0388	2.62711	0.366362	0.47	1.16842	3.11	4	3254	22.0737	31	1	0	0	0	0	0	0	0	0	0
0	35.453	4.18492	0.405746	0.36	1.23547	2.5	4	2969	23.5443	23	1	0	0	0	0	0	0	0	0	0
0	44.0149	4.25798	0.28264	0.19	1.07457	2.18	7	3166	27.2032	34	1	0	0	0	0	0	0	0	0	0
0	54.7054	4.48982	0.481247	0.35	1.69243	3.9	4	2464	27.1051	26	1	0	0	0	0	0	0	0	0	0
0	22.0721	2.5524	0.591244	0.48	1.03804	2.35	6	3199	27.7565	30	1	0	0	0	0	0	0	0	0	0
0	53.0469	3.92864	0.516237	0.42	1.33629	3.2	6	4089	23.5279	32	1	0	0	0	0	0	0	0	0	0
0	67.3043	2.83838	0.315996	0.41	0.645837	3.1	5	2975	27.586	26	1	0	0	0	0	0	0	0	0	0
0	78.4479	3.81703	0.174134	0.48	1.03284	2.27	5	2821	17.5873	26	1	0	0	0	0	0	0	0	0	0
0	68.2018	5.20984	0.368721	0.36	0.227948	3.74	4	3712	21.8974	29	1	0	0	0	0	0	0	0	0	0
0	60.6271	3.29524	0.454356	0.35	1.07216	1.77	5	3463	26.3707	25	1	0	0	0	0	0	0	0	0	0
0	26.0721	4.56069	0.443765	0.36	0.429225	1.92	5	3732	20.3781	27	1	0	0	0	0	0	0	0	0	0
0	41.7282	3.03997	0.235622	0.45	0.96483	3.4	4	3352	23.0242	26	1	0	0	0	0	0	0	0	0	0
0	45.1991	3.32116	0.247709	0.35	0.922451	1.49	6	3267	24.0084	30	1	0	0	0	0	0	0	0	0	0
0	59.8861	4.27242	0.376968	0.46	1.40144	3.03	4	3396	20.6617	31	1	0	0	0	0	0	0	0	0	0
0	48.6272	3.11314	0.428005	0.26	0.763551	2.72	4	2684	25.6908	32	1	0	0	0	0	0	0	0	0	0
0	32.5849	2.05133	0.453595	0.26	0.754878	3.1	6	3203	23.2567	28	1	0	0	0	0	0	0	0	0	0
0	73.5344	5.12951	0.447734	0.39	0.237674	3.13	5	3281	18.6741	28	1	0	0	0	0	0	0	0	0	0
0	62.7784	4.19115	0.262758	0.46	1.26249	2.11	4	3939	25.4387	28	1	0	0	0	0	0	0	0	0	0
0	53.401	3.21216	0.227032	0.34	1.44754	2.1	5	3474	17.1514	29	1	0	0	0	0	0	0	0	0	0
0	67.046	1.74942	0.154476	0.32	0.927999	3.15	6	3833	24.6284	28	1	0	0	0	0	0	0	0	0	0
0	31.47	5.79017	0.415447	0.1	1.60227	3.2	4	3105	18.6311	26	1	0	0	0	0	0	0	0	0	0
0	59.292	7.3335	0.448949	0.42	0.855416	1.8	6	2690	23.4814	29	1	0	0	0	0	0	0	0	0	0
0	42.8217	4.03261	0.397919	0.29	0.621256	1.71	5	2703	22.9074	27	1	0	0	0	0	0	0	0	0	0
0	59.611	4.69875	0.253309	0.42	1.10789	1.82	4	2484	25.4266	29	1	0	0	0	0	0	0	0	0	0
0	49.2512	5.08739	0.52562	0.52	1.28853	2.57	5	2250	22.8228	28	1	0	0	0	0	0	0	0	0	0
0	58.9043	3.08961	0.324732	0.33	0.427153	2.56	3	2904	24.3045	25	1	0	0	0	0	0	0	0	0	0
0	68.6796	3.45322	0.547526	0.45	0.370995	4.21	5	2857	18.9403	32	1	0	0	0	0	0	0	0	0	0
0	50.1989	2.02628	0.420264	0.37	1.03568	2.96	5	3732	21.0736	29	1	0	0	0	0	0	0	0	0	0
0	64.2556	3.05355	0.486496	0.42	1.20719	2.47	5	2328	25.0238	28	1	0	0	0	0	0	0	0	0	0
0	33.5618	4.46292	0.397375	0.27	0.0908822	2.21	5	3152	18.4985	30	1	0	0	0	0	0	0	0	0	0
0	40.0572	3.51594	0.356401	0.42	0.343114	2.2	5	2881	17.8821	25	1	0	0	0	0	0	0	0	0	0
0	71.2356	3.59528	0.258137	0.51	1.13896	2.14	6	3382	20.834	35	1	0	0	0	0	0	0	0	0	0
0	55.3484	3.7007	0.305205	0.56	1.36853	1.81	7	3435	20.9701	30	1	0	0	0	0	0	0	0	0	0
0	21.5432	1.88467	0.358219	0.26	0.866805	2.7	7	2691	21.3959	28	1	0	0	0	0	0	0	0	0	0
0	31.1185	4.68612	0.392344	0.43	1.4917	0.34	4	3000	29.3545	32	1	0	0	0	0	0	0	0	0	0
0	47.3038	2.32042	0.359659	0.33	0.774791	1.76	4	2979	16.221	29	1	0	0	0	0	0	0	0	0	0
0	62.1437	3.60113	0.344653	0.43	0.951465	3.27	4	2593	18.2332	27	1	0	0	0	0	0	0	0	0	0
0	48.6799	3.36261	0.382124	0.36	1.55071	2.68	5	3133	18.5581	24	1	0	0	0	0	0	0	0	0	0
0	58.7823	3.59074	0.308744	0.36	0.985108	2.97	5	2910	26.36	29	1	0	0	0	0	0	0	0	0	0
0	63.4409	5.33153	0.307545	0.45	1.02756	2.16	5	2779	25.6848	31	1	0	0	0	0	0	0	0	0	0
0	73.3482	3.21379	0.212198	0.45	0.661741	3.57	5	2609	18.1799	30	1	0	0	0	0	0	0	0	0	0
0	50.8769	3.0053	0.450831	0.41	1.04382	2.37	5	3105	17.7172	24	1	0	0	0	0	0	0	0	0	0
0	49.3742	2.24144	0.367968	0.43	0.762747	2.99	5	3115	20.2509	30	1	0	0	0	0	0	0	0	0	0
0	25.7032	2.98186	0.354434	0.42	0.306265	2.59	4	2781	14.5348	27	1	0	0	0	0	0	0	0	0	0
0	51.4795	2.60801	0.286296	0.41	0.633834	2.91	4	3816	23.081	29	1	0	0	0	0	0	0	0	0	0
0	42.1408	4.2405	0.337417	0.39	0.923031	2.27	4	2543	21.1212	33	1	0	0	0	0	0	0	0	0	0
0	36.5453	2.92243	0.250442	0.47	1.082	3.45	5	2991	15.4873	30	1	0	0	0	0	0	0	0	0	0
0	47.5943	4.13275	0.254328	0.45	1.43939	2.22	4	2743	20.5704	30	1	0	0	0	0	0	0	0	0	0
0	64.2192	3.66558	0.164175	0.46	1.03256	4.59	6	3473	21.2332	26	1	0	0	0	0	0	0	0	0	0
0	22.3707	2.33072	0.46487	0.49	0.96699	2.46	7	3593	24.2631	29	1	0	0	0	0	0	0	0	0	0
0	44.1524	2.99751	0.376161	0.43	1.45444	2.67	4	1943	21.2002	24	1	0	0	0	0	0	0	0	0	0
0	51.7203	4.73536	0.247333	0.37	1.97168	2.14	6	2811	18.9379	31	1	0	0	0	0	0	0	0	0	0
0	37.6695	4.75399	0.483747	0.27	0.983575	3.09	5	2201	19.1842	26	1	0	0	0	0	0	0	0	0	0
0	54.7433	5.89736	0.427851	0.33	1.48283	2.71	5	3925	26.0344	25	1	0	0	0	0	0	0	0	0	0
0	55.822	3.81372	0.440062	0.3	1.20946	3.02	5	3143	20.3459	26	1	0	0	0	0	0	0	0	0	0
0	49.6378	2.26615	0.339698	0.35	0.987286	3.08	5	3281	22.4133	31	1	0	0	0	0	0	0	0	0	0
0	15.7874	3.02053	0.319266	0.33	0.258274	2.04	5	3086	22.7835	29	1	0	0	0	0	0	0	0	0	0
0	85.8762	4.24107	0.352938	0.36	0.634996	3.16	4	2360	22.9143	22	1	0	0	0	0	0	0	0	0	0
0	47.241	5.78802	0.405055	0.28	0.797332	1.74	5	2348	16.2267	22	1	0	0	0	0	0	0	0	0	0
0	59.158	3.93152	0.446026	0.32	0.578624	2.69	6	3485	23.7499	27	1	0	0	0	0	0	0	0	0	0
0	53.9066	5.0001	0.527875	0.42	0.558454	3.22	5	3245	25.4699	26	1	0	0	0	0	0	0	0	0	0
0	64.3546	4.61399	0.31033	0.4	0.854164	1.46	4	2742	28.4519	29	1	0	0	0	0	0	0	0	0	0
0	61.4742	2.60604	0.257825	0.34	1.39349	2.27	4	2420	16.86	27	1	0	0	0	0	0	0	0	0	0
0	47.1784	3.63998	0.373558	0.48	0.653715	2.3	6	3398	17.4608	27	1	0	0	0	0	0	0	0	0	0
0	55.3592	5.17109	0.676389	0.22	1.06404	1.13	5	2661	22.903	30	1	0	0	0	0	0	0	0	0	0
0	36.9432	4.72601	0.318671	0.43	0.937122	2.44	5	2941	19.6472	31	1	0	0	0	0	0	0	0	0	0
0	62.0205	4.29843	0.48187	0.53	1.33074	3.57	5	3442	25.6882	27	1	0	0	0	0	0	0	0	0	0
0	43.6826	4.31224	0.337902	0.34	1.03253	1.59	5	2671	16.1894	30	1	0	0	0	0	0	0	0	0	0
0	83.724	3.30781	0.313495	0.42	0.950885	1.81	5	2468	22.6664	23	1	0	0	0	0	0	0	0	0	0
0	27.1251	2.44913	0.289458	0.33	0.786487	2.3	5	3970	22.7169	26	1	0	0	0	0	0	0	0	0	0
0	43.6416	5.16089	0.341204	0.38	1.36978	2.54	3	2837	24.428	30	1	0	0	0	0	0	0	0	0	0
0	61.5816	2.34456	0.533298	0.46	1.46756	2.65	4	3905	24.4914	28	1	0	0	0	0	0	0	0	0	0
0	57.1953	2.84373	0.394394	0.29	1.02502	2.71	4	2863	21.7731	31	1	0	0	0	0	0	0	0	0	0
0	41.8955	4.46972	0.413622	0.33	2.31022	2.38	4	3275	15.6996	25	1	0	0	0	0	0	0	0	0	0
0	36.2284	2.50844	0.45005	0.43	1.01615	4.23	6	3320	22.5227	31	1	0	0	0	1	0	0	0	0	0
0	52.1077	3.2451	0.577869	0.42	2.17272	2.26	6	2536	22.6887	31	1	0	0	0	0	0	0	0	0	0
0	49.8984	2.59078	0.443507	0.46	0.964433	1.64	6	2738	15.0379	29	1	0	0	0	0	0	0	0	0	0
0	25.1878	4.46111	0.215162	0.5	0.396651	1.48	5	3939	25.2512	29	1	0	0	0	0	0	0	0	0	0
0	50.5782	4.28029	0.255964	0.46	0.454322	2.44	6	3068	21.7606	32	1	0	0	0	0	0	0	0	0	0
0	52.7443	4.25496	0.198332	0.27	0.672964	2.2	4	3568	17.5511	28	1	0	0	0	0	0	0	0	0	0
0	52.5286	4.2763	0.0678091	0.4	1.60155	3.31	3	2322	22.3271	30	1	0	0	0	0	0	0	0	0	0
0	35.4181	4.39534	0.496906	0.34	1.69043	2.45	3	3509	24.6745	25	1	0	0	0	0	0	0	0	0	0
0	56.7223	4.48049	0.311921	0.38	1.17446	2.63	5	2939	23.394	27	1	0	0	0	0	0	0	0	0	0
0	69.2786	1.77578	0.404047	0.47	1.13924	1.44	5	2997	19.995	30	1	0	0	0	0	0	0	0	0	0
0	56.4454	3.6631	0.485595	0.41	0.805152	2.41	4	2831	29.5011	27	1	0	0	0	0	0	0	0	0	0
0	34.2971	3.93407	0.310044	0.4	0.74994	2.39	6	3045	20.7469	28	1	0	0	0	0	0	0	0	0	0
0	44.036	4.56898	0.349112	0.37	0.733648	1.59	5	3167	22.5307	32	1	0	0	0	0	0	0	0	0	0
0	54.9131	2.58592	0.399412	0.42	0.673328	1.94	5	2279	23.0291	29	1	0	0	0	0	0	0	0	0	0
0	41.0946	3.29931	0.386519	0.26	0.803979	1.97	6	2709	24.6393	30	1	0	0	0	0	0	0	0	0	0
0	20.0764	2.70399	0.282834	0.34	0.771273	3.16	6	3287	24.2972	32	1	0	0	0	0	0	0	0	0	0
0	62.4007	4.91387	0.438863	0.54	1.2262	2.97	6	3022	21.3219	28	1	0	0	0	0	0	0	0	0	0
0	38.5563	5.14393	0.419666	0.44	1.32194	3.07	6	3127	20.9341	28	1	0	0	0	0	0	0	0	0	0
0	42.117	4.63431	0.333201	0.29	1.65085	3.56	4	2941	17.6768	32	1	0	0	0	0	0	0	0	0	0
0	71.0224	2.54971	0.236385	0.26	0.0497318	2.35	5	3640	22.8191	23	1	0	0	0	0	0	0	0	0	0
0	39.3261	4.28614	0.428757	0.29	1.21299	3.41	5	3079	23.8406	30	1	0	0	0	0	0	0	0	0	0
0	61.8648	5.01054	0.511086	0.44	0.89149	2.39	5	3042	19.9413	29	1	0	0	0	0	0	0	0	0	0
0	32.5565	3.9916	0.506214	0.42	0.912069	3.39	6	3397	24.3201	34	1	0	0	0	0	0	0	0	0	0
0	45.1644	3.23034	0.453564	0.32	0.368596	1.7	4	4137	21.6025	28	1	0	0	0	0	0	0	0	0	0
0	49.074	2.69105	0.313019	0.34	1.00434	2.15	4	3330	23.1902	29	1	0	0	0	0	0	0	0	0	0
0	33.8371	3.12747	0.308021	0.48	0.710687	3.22	5	3613	18.8376	25	1	0	0	0	0	0	0	0	0	0
0	41.2657	4.55879	0.302181	0.35	1.15792	3.74	4	2698	25.0706	28	1	0	0	0	0	0	0	0	0	0
0	49.6962	3.36977	0.320424	0.37	0.577596	2.55	6	3112	16.9532	25	1	0	0	0	0	0	0	0	0	0
0	59.4294	4.05349	0.43662	0.42	2.37907	2.35	5	2851	28.5993	31	1	0	0	0	0	0	0	0	0	0
0	27.1321	5.16039	0.389682	0.36	0.70828	3.02	3	3491	20.7745	29	1	0	0	0	0	0	0	0	0	0
0	45.231	4.41721	0.170664	0.31	0.90582	2.49	5	3145	16.5604	28	1	0	0	0	0	0	0	0	0	0
0	60.6219	5.2327	0.170226	0.34	0.531774	2.59	5	3374	17.7984	30	1	0	0	0	0	0	0	0	0	0
0	42.6006	2.05277	0.360736	0.27	0.88884	2.76	4	4315	14.512	33	1	0	0	0	0	0	0	0	0	0
0	53.2599	3.52635	0.378646	0.43	1.86072	3.34	4	2775	20.6861	27	1	0	0	0	0	0	0	0	0	0
0	56.9462	3.88491	0.123899	0.51	0.864451	1.83	5	3334	22.0381	30	1	0	0	0	0	0	0	0	0	0
0	53.8241	4.41747	0.278466	0.4	1.25847	2.27	6	2604	19.1755	29	1	0	0	0	0	0	0	0	0	0
0	59.1868	2.60488	0.36596	0.46	0.64597	3	5	2741	20.8072	25	1	0	0	0	0	0	0	0	0	0
0	48.3901	4.65351	0.514639	0.32	1.62524	1.07	6	3589	16.9123	24	1	0	0	0	0	0	0	0	0	0
0	44.3416	4.13622	0.154439	0.37	1.20241	3.49	6	3040	24.884	33	1	0	0	0	0	0	0	0	0	0
0	13.3212	4.09102	0.232958	0.37	0.73415	2.12	4	3241	20.8173	34	1	0	0	0	0	0	0	0	0	0
0	48.8043	4.34477	0.251113	0.24	1.1084	1.85	6	2748	22.369	33	1	0	0	0	0	0	0	0	0	0
0	56.0843	3.69676	0.381285	0.39	0.864463	2.7	5	3018	28.6817	26	1	0	0	0	0	0	0	0	0	0
0	57.5469	4.77729	0.397399	0.43	1.21836	4.15	5	2623	24.7426	28	1	0	0	0	0	0	0	0	0	0
0	42.3714	4.4897	0.329859	0.45	0.697493	2.11	7	3352	17.3076	35	1	0	0	0	0	0	0	0	0	0
0	74.8571	3.66166	0.195961	0.51	1.20038	1.53	6	2656	25.2536	31	1	0	0	0	0	0	0	0	0	0
0	54.0827	4.89638	0.297737	0.24	1.64295	2.48	5	2931	15.6518	31	1	0	0	0	0	0	0	0	0	0
0	51.855	4.12084	0.305	0.44	1.51633	3.4	4	2880	31.2496	34	1	0	0	0	0	0	0	0	0	0
0	67.7995	4.51098	0.342102	0.45	1.13786	2.38	5	3150	26.4579	25	1	0	0	0	0	0	0	0	0	0
0	40.1008	3.20123	0.531339	0.36	1.14919	3	6	2893	16.0281	27	1	0	0	0	0	0	0	0	0	0
0	43.8315	5.45646	0.292946	0.44	1.1839	3.39	6	2481	18.4986	27	1	0	0	0	0	0	0	0	0	0
0	83.4551	3.8133	0.371009	0.24	1.37234	1.38	6	3208	26.7226	27	1	0	0	0	0	0	0	0	0	0
0	50.2523	4.69671	0.289978	0.4	1.16984	3	5	3430	17.4008	25	1	0	0	0	0	0	0	0	0	0
0	72.8266	3.71361	0.234535	0.07	1.25684	2.22	5	3849	29.6348	29	1	0	0	0	0	0	0	0	0	0
0	30.0823	3.52744	0.429028	0.41	1.26938	2.54	5	2408	25.944	28	1	0	0	0	0	0	0	0	0	0
0	47.4466	4.63096	0.25419	0.54	1.10735	4.15	6	3736	24.2612	26	1	0	0	0	0	0	0	0	0	0
0	55.3628	2.17407	0.646648	0.53	1.30203	2.76	5	2606	19.8332	35	1	0	0	0	0	0	0	0	0	0
0	54.2721	4.31354	0.372698	0.12	1.04019	3.15	5	2992	27.1353	29	1	0	0	0	0	0	0	0	0	0
0	36.1052	4.22559	0.369349	0.43	1.41696	1.88	4	2520	22.0124	21	1	0	0	0	0	0	0	0	0	0
0	50.3654	1.02218	0.356205	0.35	0.848108	2.88	5	3783	25.1078	28	1	0	0	0	0	0	0	0	0	0
0	35.1064	4.19947	0.554224	0.38	1.09391	2.49	5	3143	19.4141	21	1	0	0	0	0	0	0	0	0	0
0	60.0139	1.56862	0.431929	0.16	1.03017	2.42	5	3059	24.1823	28	1	0	0	0	0	0	0	0	0	0
0	65.1908	4.5017	0.337084	0.42	0.59287	2.97	5	3280	18.046	30	1	0	0	0	0	0	0	0	0	0
0	19.1394	3.34669	0.24221	0.33	1.49107	1.52	5	4396	19.5459	27	1	0	0	0	0	0	0	0	0	0
0	67.2907	3.09673	0.255423	0.42	0.557986	3.55	6	2776	20.7684	29	1	0	0	0	0	0	0	0	0	0
0	32.8298	3.81033	0.281727	0.36	1.53308	4.18	5	3285	25.5211	30	1	0	0	0	0	0	0	0	0	0
0	56.425	5.24139	0.48905	0.28	0.595118	2.27	6	3123	22.0158	28	1	0	0	0	0	0	0	0	0	0
0	59.2792	3.15856	0.343512	0.41	0.629254	2.94	4	3157	19.8314	33	1	0	0	0	0	0	0	0	0	0
0	47.3162	4.39623	0.284608	0.44	1.35753	4.02	4	3593	17.7964	35	1	0	0	0	0	0	0	0	0	0
0	41.1215	4.17124	0.445212	0.39	0.985034	1.96	5	3172	18.8542	31	1	0	0	0	0	0	0	0	0	0
0	52.3977	2.59418	0.502551	0.44	0.288185	2.61	6	3042	22.468	32	1	0	0	0	0	0	0	0	0	0
0	56.2031	2.01186	0.291104	0.33	1.61143	4.2	5	3224	22.6196	36	1	0	0	0	0	0	0	0	0	0
0	62.3876	1.75097	0.316979	0.51	0.0339624	1.93	4	2749	20.4085	28	1	0	0	0	0	0	0	0	0	0
0	21.5416	4.38915	0.398897	0.35	0.743676	3.25	5	3943	19.0772	29	1	0	0	0	0	0	0	0	0	0
0	27.3292	3.7814	0.362601	0.32	0.416555	2.91	5	3936	14.2679	24	1	0	0	0	0	0	0	0	0	0
0	69.9998	5.73662	0.405229	0.48	0.792897	2.32	6	2711	22.6876	29	1	0	0	0	0	0	0	0	0	0
0	64.66	4.41238	0.540805	0.49	1.05238	2.83	6	2208	20.1077	27	1	0	0	0	0	0	0	0	0	0
0	56.154	4.69863	0.356843	0.45	0.885534	2.35	6	3978	21.2317	28	1	0	0	0	0	0	0	0	0	0
0	60.0483	5.20129	0.334004	0.4	0.788595	3.11	5	3305	20.9151	29	1	0	0	0	0	0	0	0	1	0
0	62.8588	3.29815	0.413423	0.54	0.952611	2.22	4	2430	14.3574	28	1	0	0	0	0	0	0	0	0	0
0	13.0739	4.34644	0.357988	0.28	1.1237	1.35	6	2704	21.0852	28	1	0	0	0	0	0	0	0	0	0
0	65.5456	4.71844	0.42818	0.49	0.679172	3.15	6	2604	27.5857	21	1	0	0	0	0	0	0	0	0	0
0	43.3494	5.23755	0.339885	0.55	0.19743	3.37	6	3139	27.7443	33	1	0	0	0	0	0	0	0	0	0
0	53.3062	4.60836	0.409081	0.39	0.651477	2.66	6	2951	16.2257	31	1	0	0	0	0	0	0	0	0	0
0	45.9907	4.2542	0.200998	0.44	0.264805	2	5	3712	21.493	23	1	0	0	0	0	0	0	0	0	0
0	62.2298	2.91702	0.364544	0.44	1.2684	2.24	6	3937	14.2418	29	1	0	0	0	0	0	0	0	0	0
0	45.2489	4.57404	0.30959	0.5	1.75635	1.65	6	3498	19.3542	33	1	0	0	0	0	0	0	0	0	0
0	57.3118	4.33625	0.239686	0.3	0.564692	1.6	4	3069	27.3602	34	1	0	0	0	0	1	0	0	0	0
0	44.6615	4.4752	0.320282	0.47	0.667445	3.37	6	3594	24.2483	36	1	0	0	0	0	0	0	0	0	0
0	34.8926	4.25679	0.401666	0.21	0.671358	1.13	6	2734	20.2084	27	1	0	0	0	0	0	0	0	0	0
0	66.9333	3.60811	0.372676	0.58	1.32888	2.97	6	2779	20.0295	32	1	0	0	0	0	0	0	0	0	0
0	60.4062	3.73772	0.434993	0.32	1.02972	2.31	5	3090	21.1067	33	1	0	0	0	0	0	0	0	0	0
0	74.0885	4.53028	0.460641	0.35	1.21055	1.65	4	2993	17.3218	26	1	0	0	0	0	0	0	0	0	0
0	51.004	3.99543	0.448985	0.41	1.32219	2.42	4	2721	21.7326	31	1	0	0	0	0	0	0	0	0	0
0	65.7505	2.95655	0.329465	0.26	1.11527	2.45	5	3250	18.4969	30	1	0	0	0	0	0	0	0	0	0
0	77.5831	3.51652	0.22542	0.35	1.1943	3.42	5	2790	16.7324	33	1	0	0	0	0	0	0	0	0	0
0	46.181	2.4494	0.334042	0.39	0.557934	4.26	6	3602	18.5552	30	1	0	0	0	0	0	0	0	0	0
0	31.6902	2.81455	0.484355	0.35	0.99292	3.86	5	2916	24.9813	28	1	0	0	0	0	0	0	0	0	0
0	46.7672	3.66746	0.35051	0.58	0.773875	3.72	5	2912	17.7688	30	1	0	0	0	0	0	0	0	0	0
0	47.1193	1.95264	0.193374	0.21	0.501716	3.71	6	3049	18.0974	25	1	0	0	0	0	0	0	0	0	0
0	52.2079	2.06629	0.414042	0.37	0.555397	3.23	5	3707	13.399	31	1	0	0	0	0	0	0	0	0	0
0	73.9221	4.96088	0.392318	0.5	1.38785	2.26	5	3360	23.2509	28	1	0	0	0	0	0	0	0	0	0
0	45.5595	3.21944	0.321574	0.3	0.503409	2.7	6	3246	21.688	30	1	0	0	0	0	0	0	0	0	0
0	55.2874	1.89709	0.381074	0.37	0.857561	1.5	6	3551	20.0583	29	1	0	0	0	0	0	0	0	0	0
0	46.9295	3.70039	0.50506	0.57	1.40561	2.03	4	2578	24.5061	30	1	0	0	0	0	0	0	0	0	0
0	50.382	5.18748	0.497784	0.2	1.14745	1.97	5	3607	21.4584	26	1	0	0	0	0	0	0	0	0	0
0	54.4672	4.50424	0.315801	0.3	1.27512	1.81	5	3082	23.3647	28	1	0	0	0	0	0	0	0	0	0
0	68.578	4.27518	0.364208	0.26	1.14829	3.57	5	2413	19.9428	27	1	0	0	0	0	0	0	0	0	0
0	51.7855	5.04507	0.212365	0.44	0.958507	2.93	5	2807	19.2066	31	1	0	0	0	0	0	0	0	0	0
0	60.0158	3.01733	0.287661	0.3	0.148089	2.76	6	2910	25.1782	35	1	0	0	0	0	0	0	0	0	0
0	60.9344	4.57418	0.571287	0.43	0.776746	2.57	6	3779	24.2526	30	1	0	0	0	0	0	0	0	0	0
0	62.8254	3.20858	0.518394	0.32	0.47268	3.27	4	2157	24.5287	25	1	0	0	0	0	0	0	0	0	0
0	42.1054	3.81823	0.339337	0.37	0.867932	3.2	5	2918	22.8193	25	1	0	0	0	0	0	0	0	0	0
0	72.7336	6.114	0.291319	0.46	1.82904	1.94	6	2633	20.968	29	1	0	0	0	0	0	0	0	0	0
0	44.7969	4.82281	0.221432	0.39	1.07196	1.17	5	3203	18.4024	32	1	0	0	0	0	0	0	0	0	0
0	48.6256	4.61392	0.583499	0.19	0.733157	1.75	5	3087	28.1882	33	1	0	0	0	0	0	0	0	0	0
0	69.6331	2.66801	0.374986	0.33	1.36852	2.23	7	3565	21.9185	25	1	0	0	0	0	0	0	0	0	0
0	68.1031	3.00205	0.301531	0.45	1.21151	2.58	4	3535	20.2059	29	1	0	0	0	0	0	0	0	0	0
0	34.9315	6.18623	0.47486	0.56	0.985585	3.63	6	3407	27.4728	29	1	0	0	0	0	0	0	0	0	0
0	37.9497	2.6836	0.249115	0.27	0.927385	3.02	5	3907	27.1841	28	1	0	0	0	0	0	0	0	0	0
0	31.2014	4.03987	0.438422	0.36	0.959846	3.06	4	2580	19.0987	25	1	0	0	0	0	0	0	0	0	0
0	52.6276	4.7431	0.51247	0.37	0.989114	3.15	5	2851	21.3792	31	1	0	0	0	0	0	0	0	0	0
0	52.391	4.87396	0.341316	0.31	1.26215	2.49	5	3523	20.4051	23	1	0	0	0	0	0	0	0	0	0
0	55.1637	4.94692	0.51355	0.24	1.06778	1.82	4	2810	24.676	31	1	0	0	0	0	0	0	0	0	0
0	57.7801	3.64826	0.429609	0.56	0.769421	1.95	5	2502	20.3122	24	1	0	0	0	0	0	0	0	0	0
0	41.7228	2.96601	0.292734	0.53	1.34705	1.63	6	3240	22.3251	28	1	0	0	0	0	0	0	0	0	0
0	36.2713	3.49879	0.422639	0.24	0.741353	1.67	5	3454	21.5305	28	1	0	0	0	0	0	0	0	0	0
0	64.3839	2.88189	0.29007	0.2	1.5347	1.51	7	2840	21.3713	27	1	0	0	0	0	0	0	0	0	0
0	60.5476	4.46775	0.307748	0.35	0.630007	3.18	6	1837	18.0329	27	1	0	0	0	0	0	0	0	0	0
0	29.0992	4.97933	0.443379	0.42	1.31291	1.73	4	2573	21.8832	30	1	0	0	0	0	0	0	0	0	0
0	48.7736	6.02351	0.313798	0.37	1.51437	3.01	6	2499	22.9574	33	1	0	0	0	0	0	0	0	0	0
0	37.6314	4.19712	0.360571	0.49	1.5003	4.22	6	2785	21.5178	29	1	0	0	0	0	0	0	0	0	0
0	21.2854	2.91022	0.468738	0.36	0.973015	2.44	5	2898	20.1131	27	1	0	0	0	0	0	0	0	0	0
0	52.1862	4.87989	0.238127	0.27	1.29087	2.45	6	3537	23.3304	27	1	0	0	0	0	0	0	0	0	0
0	48.9953	4.75574	0.528479	0.53	0.17262	3.17	6	2422	21.8061	31	1	0	0	0	0	0	0	0	0	0
0	48.7427	3.57035	0.574782	0.36	1.19288	2.57	6	2797	24.2506	27	1	0	0	0	0	0	0	0	0	0
0	53.105	2.20182	0.426803	0.35	0.974151	2.04	6	2738	17.8694	24	1	0	0	0	0	0	0	0	0	0
0	62.3759	4.60697	0.406842	0.35	1.25437	1.58	4	3737	28.0803	29	1	0	0	0	0	0	0	0	0	0
0	52.9581	4.98844	0.311641	0.39	1.06031	2.64	7	2391	17.7994	32	1	0	0	0	0	0	0	0	0	0
0	41.5205	3.51138	0.413998	0.15	1.52899	2.28	5	2366	19.6994	30	1	0	0	0	0	0	0	0	0	0
0	39.8736	4.37356	0.311065	0.45	0.949902	2.85	5	3558	23.9681	34	1	0	0	0	0	0	0	0	0	0
0	48.2636	3.53131	0.392976	0.45	1.30728	2.78	6	3094	22.7274	36	1	0	0	0	0	0	0	0	0	0
0	54.411	4.52505	0.291924	0.44	0.975467	3.49	5	2810	16.2795	31	1	0	0	0	0	0	0	0	0	0
0	35.6315	3.69579	0.444833	0.34	1.27647	3	7	2746	19.2193	28	1	0	0	0	0	0	0	0	0	0
0	47.533	3.45998	0.434773	0.39	0.530786	3.38	4	1886	23.8871	33	1	0	0	0	0	0	0	0	0	0
0	63.5558	3.93319	0.491958	0.24	1.25703	2.63	5	3204	28.7755	31	1	0	0	0	0	0	0	0	0	0
0	48.5909	3.52352	0.568588	0.42	0.863385	3.15	5	3013	27.2752	35	1	0	0	0	0	0	0	0	0	0
0	40.3798	3.2045	0.29609	0.3	1.17335	2.4	6	3588	28.1043	30	1	0	0	0	0	0	0	0	0	0
0	46.258	3.48978	0.463263	0.51	0.671443	2.47	8	2859	25.3118	28	1	0	0	0	0	0	0	0	0	0
0	65.6065	3.80898	0.215146	0.29	1.23137	2.63	4	3544	23.0579	31	1	0	0	0	0	0	0	0	0	0
0	57.7507	4.03262	0.315678	0.18	2.19948	1.8	6	3195	20.4322	29	1	0	0	0	0	0	0	0	0	0
0	67.3043	5.40667	0.461114	0.4	1.62609	1.73	6	3420	23.7033	30	1	0	0	0	0	0	0	0	0	0
0	52.0328	2.40909	0.286558	0.22	1.40475	2.37	6	2250	19.2788	33	1	0	0	0	0	0	0	0	0	0
0	55.8059	3.61041	0.398934	0.29	0.772725	1.59	4	3536	14.5035	25	1	0	0	0	0	0	0	0	0	0
0	42.3272	4.47237	0.269759	0.46	1.14571	2.65	5	3440	25.5546	27	1	0	0	0	0	0	0	0	0	0
0	58.5205	5.64478	0.324711	0.56	0.954767	3.14	5	3684	19.6141	26	1	0	0	0	0	0	0	0	0	0
0	43.0524	4.25924	0.358874	0.35	0.232887	1.96	4	3053	23.8861	26	1	0	0	0	0	0	0	0	0	0
0	30.332	3.80317	0.299627	0.48	0.922431	2.61	4	2578	15.4584	29	1	0	0	0	0	0	0	0	0	0
0	51.8783	3.49847	0.161387	0.25	0.892253	1.5	4	3013	9.47071	27	1	0	0	0	0	0	0	0	0	0
0	77.1717	4.2471	0.388303	0.55	0.981918	3.23	6	3426	20.9985	31	1	0	0	0	0	0	0	0	0	0
0	61.2412	4.84316	0.412333	0.38	0.807107	2.33	4	3485	16.4143	33	1	0	0	0	0	0	0	0	0	0
0	66.3106	3.62676	0.377275	0.3	1.27492	3.65	6	3692	20.119	27	1	0	0	0	0	0	0	0	0	0
0	55.0905	3.98727	0.312437	0.42	1.77549	2.61	6	3048	22.5551	30	1	0	0	0	0	0	0	0	0	0
0	41.6301	4.04241	0.456422	0.3	1.47401	3.88	4	3806	19.5453	30	1	0	0	0	0	0	0	0	0	0
0	47.2835	4.57375	0.474805	0.39	1.27822	2.81	6	2715	21.492	26	1	0	0	0	0	0	0	0	0	0
0	46.2955	4.97002	0.117037	0.39	1.0391	2.45	6	1843	18.8965	30	1	0	0	0	0	0	0	0	0	0
0	43.5761	4.10694	0.479682	0.5	1.04726	3.29	4	3184	17.617	26	1	0	0	0	0	0	0	0	1	0
0	59.8951	3.73844	0.178627	0.32	1.47475	2.95	6	3062	20.5739	25	1	0	0	0	0	0	0	0	0	0
0	33.4376	5.2638	0.327385	0.34	1.5238	2.19	5	2477	24.8693	23	1	0	0	0	0	0	0	0	0	0
0	62.1519	3.98807	0.248121	0.39	0.783421	3.07	5	3142	17.6021	34	1	0	0	0	0	0	0	0	0	0
0	62.1211	5.45378	0.297783	0.47	1.39266	3.02	4	2508	24.3957	28	1	0	0	0	0	0	0	0	0	0
0	33.42	3.75322	0.499617	0.57	0.549815	2.84	5	2693	19.5206	28	1	0	0	0	0	0	0	0	0	0
0	58.9952	4.45412	0.418513	0.54	0.546042	2.33	4	3724	16.8335	33	1	0	0	0	0	0	0	0	0	0
0	83.9112	2.21402	0.414303	0.47	1.64793	2.54	5	1668	23.5703	35	1	0	0	0	0	0	0	0	0	0
0	42.3445	3.70088	0.147688	0.19	1.03193	3.2	5	3226	23.8977	26	1	0	0	0	0	0	0	0	0	0
0	61.8533	3.79483	0.383455	0.47	1.03069	3.37	5	2868	25.3973	25	1	0	0	0	0	0	0	0	0	0
0	39.214	3.03097	0.428288	0.45	1.40421	2.79	6	2792	23.4253	28	1	0	0	0	0	0	0	0	0	0
0	65.5517	2.74314	0.452353	0.31	0.939625	2.01	5	3139	21.2405	24	1	0	0	0	0	0	0	0	0	0
0	53.5735	4.80075	0.262211	0.33	0.682766	3.11	5	2856	26.6156	27	1	0	0	0	0	0	0	0	0	0
0	73.0819	4.76548	0.460293	0.25	1.07201	2.68	6	2832	19.8849	28	1	0	0	0	0	0	0	0	0	0
0	29.7976	2.47055	0.218469	0.38	0.342148	3.38	6	2439	21.0952	27	1	0	0	0	0	0	0	0	0	0
0	49.3837	4.25755	0.543349	0.39	0.830636	1.45	5	3816	20.2529	34	1	0	0	0	0	0	0	0	0	0
0	42.7659	2.66364	0.280313	0.21	0.955399	2.06	5	3496	23.9505	29	1	0	0	0	0	0	0	0	0	0
0	47.3527	2.72739	0.442409	0.23	0.447289	2.95	6	2493	20.0988	29	1	0	0	0	0	0	0	0	0	0
0	41.3376	4.36233	0.396059	0.4	1.09035	1.63	5	2934	23.6282	34	1	0	0	0	0	0	0	0	0	0
0	38.4955	3.10598	0.252845	0.28	0.727788	4.51	5	3383	16.457	33	1	0	0	0	0	0	0	0	0	0
0	58.1497	4.84775	0.481722	0.35	1.45758	1.98	5	2819	18.7102	28	1	0	0	0	0	0	0	0	0	0
0	34.9651	3.85739	0.366563	0.48	0.906279	2.89	5	3099	22.3965	29	1	0	0	0	0	0	0	0	0	0
0	70.746	4.37346	0.447943	0.34	0.586214	1.37	5	3132	22.0545	26	1	0	0	0	0	0	0	0	0	0
0	33.5928	3.27439	0.385722	0.39	1.11187	4.13	6	3830	18.9853	27	1	0	0	0	0	0	0	0	0	0
0	51.5038	2.62353	0.453135	0.44	0.996307	3.09	5	2716	26.1707	24	1	0	0	0	0	0	0	0	0	0
0	57.5134	4.7661	0.36535	0.27	1.03327	2.22	5	3432	24.2031	31	1	0	0	0	0	0	0	0	0	0
0	58.2612	4.06433	0.478713	0.5	1.10248	2.76	5	2805	21.6843	28	1	0	0	0	0	0	0	0	0	0
0	45.899	3.5695	0.326594	0.47	0.861634	2.08	5	2951	22.4024	30	1	0	0	0	0	0	0	0	0	0
0	51.2036	3.88924	0.417764	0.51	0.88828	1.37	6	3055	20.4687	28	1	0	0	0	0	0	0	0	0	0
0	63.4723	5.1925	0.402347	0.34	1.2734	1.81	4	3222	25.5719	24	1	0	0	0	0	0	0	0	0	0
0	29.8325	3.09338	0.450581	0.24	1.66016	1.94	6	3128	22.6618	25	1	0	0	0	0	0	0	0	0	0
0	39.2205	3.04024	0.298723	0.43	0.256374	3.38	5	2856	14.5118	31	1	0	0	0	0	0	0	0	0	0
0	54.5555	3.17485	0.381523	0.44	0.963721	2.91	3	3073	21.4972	26	1	0	0	0	0	0	0	0	0	0
0	43.9088	2.17368	0.30296	0.63	1.40447	2.32	5	3195	21.2177	24	1	0	0	0	0	0	0	0	0	0
0	69.1594	4.66745	0.457297	0.55	0.551356	2.4	6	3271	17.892	24	1	0	0	0	0	0	0	0	0	0
0	59.465	4.01694	0.297101	0.33	1.47842	3.33	4	2460	20.1193	27	1	0	0	0	0	0	0	0	0	0
0	51.1016	4.03229	0.542675	0.28	0.86748	1.87	5	2977	27.2857	30	1	0	0	0	0	0	0	0	0	0
0	29.1188	3.77248	0.445037	0.44	1.29701	3	4	3909	30.1018	28	1	0	0	0	0	0	0	0	0	0
0	50.4606	3.28836	0.361682	0.58	1.59971	1.92	5	2816	25.1331	27	1	0	0	0	0	0	0	0	0	0
0	45.6949	2.96349	0.488143	0.26	1.37242	3.08	6	3102	19.8603	29	1	0	0	0	0	0	0	0	0	0
0	48.6734	4.70087	0.354334	0.3	1.49719	3.46	5	3538	24.7991	29	1	0	0	0	0	0	0	0	0	0
0	33.6575	2.33837	0.421493	0.55	0.144885	2.27	6	2516	23.7967	32	1	0	0	0	0	0	0	0	0	0
0	57.0357	4.27406	0.417858	0.56	0.514151	2.9	6	2470	27.4288	29	1	0	0	0	0	0	0	0	0	0
0	35.6416	2.99544	0.406957	0.4	1.24711	1.03	6	3618	19.1552	28	1	0	0	0	0	0	0	0	0	0
0	46.9498	4.11021	0.301239	0.22	0.65743	2.81	6	3368	24.4364	28	1	0	0	0	0	0	0	0	0	0
0	55.4045	3.04928	0.233434	0.33	0.799256	2.8	6	2569	30.3898	26	1	0	0	0	0	0	0	0	0	0
0	39.1958	3.27469	0.18878	0.5	1.56433	2.88	5	3760	14.1646	28	1	0	0	0	0	0	0	0	0	0
0	58.2091	5.6524	0.315801	0.59	1.06337	3.43	5	3543	24.4051	24	1	0	0	0	0	0	0	0	0	0
0	31.7798	4.51049	0.433884	0.38	1.03524	1.91	5	3885	25.9318	33	1	0	0	0	0	0	0	0	0	0
0	11.0028	1.59302	0.338323	0.32	0.92029	3.56	5	2521	23.068	29	1	0	0	0	0	0	0	0	0	0
0	56.5669	3.94853	0.238358	0.41	0.385907	1.9	4	3559	23.3616	23	1	0	0	0	0	0	1	0	0	0
0	61.7926	3.34887	0.586654	0.39	0.274203	1.43	5	3124	18.7951	25	1	0	0	0	0	0	0	0	1	0
0	46.1203	2.63867	0.435877	0.29	0.931284	4.13	5	2196	18.8603	31	1	0	0	0	0	0	0	0	0	0
0	57.1118	4.035	0.564899	0.44	1.15752	3.15	5	2689	17.8648	22	1	0	0	0	0	0	0	0	0	0
0	34.0142	3.95222	0.488852	0.52	0.496138	3.11	5	3419	15.4792	31	1	0	0	0	0	0	0	0	0	0
0	48.3283	3.47675	0.299724	0.38	0.302969	3.02	5	3432	22.8757	30	1	0	0	0	0	0	0	0	0	0
0	23.0835	5.86328	0.320401	0.44	1.52137	2.43	4	2398	21.7689	26	1	0	0	0	0	0	0	0	0	0
0	66.5322	1.48537	0.213755	0.41	1.21768	3.29	3	3084	21.2867	27	1	0	0	0	0	0	0	0	0	0
0	75.9759	4.68673	0.439864	0.43	1.20784	3.59	7	2219	21.9279	25	1	0	0	0	0	0	0	0	0	0
0	65.0411	3.5177	0.531419	0.36	1.37974	1.48	4	3487	19.9658	25	1	0	0	0	0	0	0	0	0	0
0	49.7169	4.49829	0.267681	0.5	1.23655	1.78	6	3306	27.4714	28	1	0	0	0	0	0	0	0	0	0
0	49.6337	3.3466	0.238477	0.4	0.600241	2.07	5	3884	22.6163	24	1	0	0	0	0	0	0	0	0	0
0	29.0032	3.20155	0.454605	0.33	1.51135	2.95	6	2958	21.3168	28	1	0	0	0	0	0	0	0	0	0
0	61.0947	2.04364	0.205898	0.44	0.512571	0.93	5	3309	17.746	27	1	0	0	0	0	0	0	0	0	0
0	47.1653	3.60022	0.562306	0.47	0.828216	2.47	6	2761	18.0134	29	1	0	0	0	0	0	0	0	0	0
0	40.9597	6.38808	0.422413	0.37	1.14916	1.56	4	2625	18.8117	30	1	0	0	0	0	0	0	0	0	0
0	30.4508	4.84383	0.185329	0.12	1.12838	2.34	5	3531	23.003	30	1	0	0	0	0	0	0	0	0	0
0	45.9266	5.55513	0.399895	0.54	1.25022	1.45	5	3504	24.5373	31	1	0	0	0	0	0	0	0	0	0
0	38.2838	4.76632	0.374007	0.31	1.36373	3.4	6	3231	19.443	29	1	0	0	0	0	0	0	0	0	0
0	44.5732	5.00412	0.107215	0.35	0.697384	2.38	5	3289	18.4988	27	1	0	0	0	0	0	0	0	0	0
0	33.156	4.75378	0.358764	0.54	0.508593	2.44	5	3225	18.8775	28	1	0	0	0	0	0	0	0	0	0
0	73.5782	4.31045	0.302225	0.19	0.555892	3.63	4	3267	17.6621	33	1	0	0	0	0	0	0	0	0	0
0	49.8748	3.21331	0.271121	0.27	1.24435	1.97	5	3166	21.7649	34	1	0	0	0	0	0	0	0	0	0
0	65.054	3.26474	0.387849	0.31	0.834473	1.49	6	2470	25.5964	30	1	0	0	0	0	0	0	0	0	0
0	13.8979	2.15724	0.45131	0.25	1.1805	2.14	5	2156	12.4302	25	1	0	0	0	0	0	0	0	0	0
0	43.7917	3.8114	0.542133	0.49	1.48481	2.12	5	2471	21.1164	30	1	0	0	0	0	0	0	0	0	0
0	40.6989	4.75013	0.0902047	0.5	0.751892	2.82	5	3653	25.8939	33	1	0	0	0	0	0	0	0	0	0
0	33.0819	4.88761	0.440189	0.43	1.38274	2.36	4	2562	18.6781	25	1	0	0	0	0	0	0	0	0	0
0	71.6167	3.91609	0.264378	0.34	0.762499	1.59	5	3355	21.0174	32	1	0	0	0	0	0	0	0	0	0
0	30.4055	3.2495	0.482974	0.34	1.26108	2.45	6	3447	24.1188	24	1	0	0	0	0	0	0	0	0	0
0	54.5275	7.22995	0.398957	0.32	1.0308	3	5	3163	22.6442	28	1	0	0	0	0	0	0	0	0	0
0	61.8746	4.58143	0.512894	0.33	0.681274	1.64	5	3228	22.5231	33	1	0	0	0	0	0	0	0	0	0
0	52.5768	5.29068	0.209393	0.43	1.39189	3.28	5	3378	13.5285	29	1	0	0	0	0	0	0	0	0	0
0	37.9193	3.46723	0.414379	0.47	1.30288	3.07	6	3808	19.9752	31	1	0	0	0	0	0	0	0	0	0
0	63.1927	3.77807	0.393701	0.34	0.674096	3.63	4	3078	20.7402	28	1	0	0	0	0	0	0	0	0	0
0	52.471	4.28267	0.471729	0.41	1.03224	2.35	4	2936	25.0327	26	1	0	0	0	0	0	0	0	0	0
0	35.3001	5.55611	0.339139	0.15	2.0141	2.87	4	2791	22.4834	33	1	0	0	0	0	0	0	0	0	0
0	30.7844	3.49441	0.481697	0.39	0.720228	1.97	5	3511	23.9931	30	1	0	0	0	0	0	0	0	0	0
0	79.1316	4.7027	0.316976	0.29	0.951458	2.4	5	3126	24.3254	27	1	0	0	0	0	0	0	0	0	0
0	40.6569	1.64495	0.318606	0.49	1.57171	1.84	5	3580	16.4064	25	1	0	0	0	0	0	0	0	0	0
0	24.2794	3.29137	0.365734	0.5	0.577244	3.33	5	2455	23.2502	30	1	0	0	0	0	0	0	0	0	0
0	57.5171	2.47752	0.252259	0.16	1.95799	1.56	4	2868	23.1332	27	1	0	0	0	0	0	0	0	0	0
0	54.4139	4.97207	0.315773	0.47	0.753644	3.01	4	2963	16.955	31	1	0	0	0	0	0	0	0	0	0
0	31.2605	3.64688	0.478171	0.32	0.811286	2.1	5	3311	14.2143	32	1	0	0	0	0	0	0	0	0	0
0	23.0635	3.41259	0.534339	0.36	1.0021	1.84	5	3380	22.2273	35	1	0	0	0	0	0	0	0	0	0
0	48.4792	5.23729	0.478612	0.47	1.44201	3.6	5	2979	22.9587	29	1	0	0	0	0	0	0	0	0	0
0	65.9508	4.97509	0.319059	0.45	2.2959	2.65	4	3183	19.0105	29	1	0	0	0	0	0	1	0	0	0
0	58.9484	2.88612	0.396118	0.3	1.20832	2.81	6	2545	24.9096	27	1	0	0	0	0	0	0	0	0	0
0	43.2388	4.26116	0.373313	0.41	1.26219	2.71	5	4016	16.6865	26	1	0	0	0	0	0	0	0	0	0
0	38.4907	2.54344	0.232586	0.33	0.474569	3.04	5	2959	28.0448	21	1	0	0	0	0	0	0	0	0	0
0	53.869	3.32419	0.389787	0.5	1.07315	3.61	5	3033	23.503	25	1	0	0	0	0	0	0	0	0	0
0	52.2868	5.49395	0.277653	0.23	0.0848376	2.62	6	2916	26.5097	31	1	0	0	0	0	0	0	0	0	0
0	58.8591	5.32133	0.253154	0.46	0.915277	3.44	6	2620	24.1935	34	1	0	0	0	0	0	0	0	0	0
0	44.5904	4.96757	0.438312	0.52	1.59484	0.93	5	3479	22.574	24	1	0	0	0	0	0	0	0	0	0
0	62.6109	3.22536	0.289715	0.12	0.939067	3.02	4	2241	22.7372	31	1	0	0	0	0	0	0	0	0	0
0	38.5377	1.86625	0.34817	0.44	0.994559	2.88	6	2931	25.8077	27	1	0	0	0	0	0	0	0	0	0
0	45.4983	2.59815	0.262163	0.34	1.03277	2.71	4	3136	25.2203	31	1	0	0	0	0	0	0	0	0	0
0	60.405	4.80531	0.368902	0.39	0.968443	2.67	5	2401	22.2539	34	1	0	0	0	0	0	0	0	0	0
0	63.8717	3.51609	0.414142	0.35	1.05687	2.26	6	3571	28.4391	26	1	0	0	0	0	0	0	0	0	0
0	23.1255	1.57465	0.415199	0.45	0.420153	2.14	5	2856	17.7683	22	1	0	0	0	0	0	0	0	0	0
0	51.5889	3.63057	0.251637	0.47	0.827314	3.35	5	3383	16.9086	28	1	0	0	0	0	0	0	0	0	0
0	58.5679	5.27996	0.493518	0.44	0.882354	2.45	5	2240	29.8393	31	1	0	0	0	0	0	0	0	0	0
0	29.911	4.48476	0.517871	0.37	1.24249	3.41	6	2950	18.6612	32	1	0	0	0	0	0	0	0	0	0
0	56.7848	2.96573	0.401761	0.34	1.09928	2.31	4	3110	26.8574	30	1	0	0	0	0	0	0	0	0	0
0	38.5744	2.2142	0.379428	0.37	0.717569	1.87	6	2456	24.2115	28	1	0	0	0	0	0	0	0	0	0
0	64.2931	2.96024	0.371121	0.36	1.35284	3.59	5	3502	19.9127	38	1	0	0	0	0	0	0	0	0	0
0	57.5898	3.85324	0.389801	0.4	1.50204	2.51	6	3204	21.4372	32	1	0	0	0	0	0	0	0	0	0
0	60.7979	4.73843	0.402125	0.3	0.511758	3.43	6	3035	20.0049	28	1	0	0	0	0	0	0	0	0	0
0	51.7771	1.80557	0.377287	0.44	1.09005	1.71	5	3161	21.7271	29	1	0	0	0	0	0	0	0	0	0
0	62.1141	4.87857	0.430881	0.28	0.721349	2.83	4	3054	19.6838	31	1	0	0	0	0	0	0	0	0	0
0	69.3057	3.82309	0.328296	0.23	0.777019	2.36	4	3388	17.6962	30	1	0	0	0	0	0	0	0	0	0
0	77.4555	4.40834	0.480176	0.41	1.18325	3.95	4	3162	23.7517	29	1	0	0	0	0	0	0	0	0	0
0	49.7024	2.10288	0.359197	0.42	1.35	3.5	5	3788	20.3778	29	1	0	0	0	0	0	0	0	0	0
0	18.8046	3.12606	0.181099	0.48	1.16756	2.97	4	2886	20.7484	30	1	0	0	0	0	0	0	0	0	0
0	50.5361	3.35258	0.352765	0.45	0.805986	2.22	5	3482	20.1889	27	1	0	0	0	0	0	0	0	0	0
0	52.9576	4.90003	0.409443	0.4	1.46376	3.27	5	3143	22.5798	28	1	0	0	0	0	0	0	0	0	0
0	47.936	4.88373	0.490614	0.45	1.4251	3.08	7	4075	18.0205	31	1	0	0	0	0	0	0	0	0	0
0	58.0045	4.26866	0.369345	0.28	0.626369	1.56	6	3091	22.5273	27	1	0	0	0	0	0	0	0	0	0
0	64.1598	5.48112	0.161986	0.27	1.14109	3.41	6	3138	19.6054	31	1	0	0	0	0	0	0	0	0	0
0	42.8903	3.28291	0.363604	0.26	0.55908	3.18	5	2916	20.6086	25	1	0	0	0	0	0	0	0	0	0
0	46.0055	4.86751	0.238787	0.38	1.59694	2.45	7	2116	19.6914	32	1	0	0	0	0	0	0	0	0	0
0	55.633	3.78016	0.261915	0.45	1.12405	4.2	5	2168	21.5897	33	1	0	0	0	0	0	0	0	0	0
0	42.4417	3.12535	0.256782	0.47	1.43903	3.25	5	3016	22.901	27	1	0	0	0	0	0	0	0	0	0
0	51.3673	4.77505	0.280251	0.53	1.17072	2.22	3	3121	18.423	24	1	0	0	0	0	0	0	0	0	0
0	22.8026	5.24974	0.480983	0.41	0.974552	3.23	6	2760	19.4257	30	1	0	0	0	0	0	0	0	0	0
0	34.5154	4.72825	0.276903	0.37	1.3139	2.87	5	3362	20.9446	29	1	0	0	0	0	0	0	0	0	0
0	31.6233	3.28914	0.317588	0.32	0.581346	2.46	4	3706	15.8978	24	1	0	0	0	0	0	0	0	0	0
0	38.2203	3.33023	0.382195	0.41	0.451193	0.29	5	3868	20.9747	31	1	0	0	0	0	0	0	0	0	0
0	40.4509	5.24619	0.455404	0.37	0.767928	2.28	6	2073	27.0661	22	1	0	0	0	0	0	0	0	0	0
0	55.4168	4.18334	0.293989	0.35	1.12151	2.6	5	3452	20.1439	26	1	0	0	0	0	0	0	0	0	0
0	63.7624	4.67776	0.277453	0.31	0.853862	3.09	5	3515	21.2533	34	1	0	0	0	0	0	0	0	0	0
0	39.9768	3.46617	0.309341	0.28	0.833539	2.83	6	3398	17.6052	31	1	0	0	0	0	0	0	0	0	0
0	36.2276	5.12522	0.241637	0.28	1.38122	2.74	4	3599	20.2438	29	1	0	0	0	0	0	0	0	0	0
0	35.6036	2.97869	0.458478	0.52	0.818889	3.64	5	3010	23.1666	20	1	0	0	0	0	0	0	0	0	0
0	44.3289	4.46597	0.136911	0.41	1.40241	2.54	6	2946	24.0894	29	1	0	0	0	0	0	0	0	0	0
0	46.7716	2.96996	0.3084	0.34	0.711901	1.84	4	3549	21.9338	25	1	0	0	0	0	0	0	0	0	0
0	56.8264	1.26356	0.213708	0.23	0.915984	2.23	6	2766	20.5832	29	1	0	0	0	0	0	0	0	0	0
0	45.6266	2.42469	0.160253	0.4	0.690808	2.45	4	3490	17.3456	29	1	0	0	0	0	0	0	0	0	0
0	21.1777	3.95878	0.366074	0.33	0.848919	2.18	5	2709	21.3422	30	1	0	0	0	0	0	0	0	0	0
0	48.8253	4.73309	0.522564	0.37	0.558277	1.27	5	2808	22.4522	28	1	0	0	0	0	0	0	0	0	0
0	66.6157	2.0012	0.532557	0.36	1.19397	3	5	2756	20.0868	28	1	0	0	0	0	0	0	0	0	0
0	66.6772	2.51961	0.304763	0.46	1.48454	3.13	5	3486	24.6432	27	1	0	0	0	0	0	0	0	0	0
0	39.12	5.6474	0.290853	0.37	1.12931	2.06	5	3051	22.18	29	1	0	0	0	0	0	0	0	0	0
0	28.562	3.36745	0.307308	0.36	1.69396	2.88	6	3327	18.1109	27	1	0	0	0	0	0	0	0	0	0
0	84.2984	4.34188	0.436716	0.61	0.36923	2.36	4	4174	20.1333	31	1	0	0	0	0	0	0	0	0	0
0	47.8375	3.27096	0.0975453	0.49	0.720351	2.37	6	2620	19.217	26	1	0	0	0	0	0	0	0	0	0
0	48.7415	3.50778	0.388781	0.39	1.22466	3	5	3690	17.032	25	1	0	0	0	0	0	0	0	0	0
0	55.9492	3.90791	0.321063	0.31	1.26762	2.87	4	3366	17.4947	28	1	0	0	0	0	0	0	0	0	0
0	27.64	3.8288	0.285983	0.5	1.14655	2.17	4	3086	20.1811	27	1	0	0	0	0	0	0	0	0	0
0	39.9651	3.61773	0.155139	0.29	1.70717	2.06	6	2534	18.8336	30	1	0	0	0	0	0	0	0	0	0
0	28.664	3.33022	0.341766	0.38	1.67939	2.96	4	4391	21.8992	24	1	0	0	0	0	0	0	0	0	0
0	40.4539	0.656574	0.192154	0.46	0.440673	1.88	5	2314	14.8254	30	1	0	0	0	0	0	0	0	0	0
0	51.7511	5.75537	0.361516	0.34	0.852394	2.08	5	2726	16.6957	32	1	0	0	0	0	0	0	0	0	0
0	31.1091	5.67424	0.270333	0.34	0.45066	3.55	4	3598	26.1024	26	1	0	0	0	0	0	0	0	0	0
0	58.3064	2.67553	0.367905	0.42	0.610013	2.69	5	2362	20.1569	31	1	0	0	0	0	0	0	0	0	0
0	54.1233	3.64309	0.410893	0.39	1.11544	2.27	5	3281	22.2758	31	1	0	0	0	0	0	0	0	0	0
0	37.5164	5.2437	0.310883	0.36	1.1562	1.75	5	2356	24.1366	31	1	0	0	0	0	0	0	0	0	0
0	53.2465	4.85274	0.257116	0.36	0.708931	3.08	4	3287	21.1407	25	1	0	0	0	0	0	0	0	0	0
0	60.5061	5.14137	0.299687	0.41	1.13652	2.19	6	4082	25.6131	28	1	0	0	0	0	0	0	0	0	0
0	64.8613	2.70595	0.293918	0.43	0.729723	2.65	6	3170	24.1976	30	1	0	0	0	0	0	0	0	0	0
0	47.1359	6.49025	0.208303	0.51	1.1159	3.41	6	3300	28.4175	24	1	0	0	0	0	0	0	0	0	0
0	48.7946	2.64195	0.28218	0.34	1.06205	2.42	4	3413	24.4765	26	1	0	0	0	0	0	0	0	0	0
0	48.8909	4.5993	0.343054	0.51	0.905105	3.3	4	2711	28.0226	30	1	0	0	0	0	0	0	0	0	0
0	70.1537	3.96395	0.34021	0.24	0.637944	1.77	4	2636	21.4985	32	1	0	0	0	0	0	0	0	0	0
0	65.7515	3.39876	0.397265	0.32	0.833457	1.34	4	2833	17.4078	30	1	0	0	0	0	0	0	0	0	0
0	61.7072	3.42395	0.497025	0.25	1.21142	2.81	7	3243	25.08	27	1	0	0	0	0	0	0	0	0	0
0	46.0994	2.78928	0.397693	0.41	0.822054	3.41	3	2584	20.3365	27	1	0	0	0	0	0	0	0	0	0
0	55.2907	5.50025	0.51609	0.42	0.888708	2.21	4	3043	23.0457	35	1	0	0	0	0	0	0	0	0	0
0	55.7088	3.91027	0.295936	0.25	0.594607	2.4	4	3447	27.3802	28	1	0	0	0	0	0	0	0	0	0
0	35.6038	4.08626	0.50312	0.39	0.845791	3.23	5	2826	24.1348	31	1	0	0	0	0	0	0	0	0	0
0	26.0501	4.03484	0.424618	0.29	1.00751	2.26	5	3052	16.2381	25	1	0	0	0	0	0	0	0	0	0
0	59.0278	3.42835	0.239565	0.43	0.72922	1.79	6	3159	26.5768	26	1	0	0	0	0	0	0	0	0	0
0	28.8189	2.64137	0.404794	0.23	0.866103	2	6	2335	23.9217	27	1	0	0	0	0	0	0	0	0	0
0	50.1209	4.08057	0.234798	0.47	0.582383	2.46	4	3002	21.0349	30	1	0	0	0	0	0	0	0	0	0
0	53.5794	1.64617	0.461297	0.38	1.31338	1.49	5	2523	19.0812	31	1	0	0	0	0	0	0	0	0	0
0	57.943	2.34627	0.30715	0.28	1.89056	3.15	4	2961	21.2583	29	1	0	0	0	0	0	0	0	0	0
0	52.7331	2.70113	0.338627	0.37	0.849301	2.98	6	3312	16.9386	30	1	0	0	0	0	0	0	0	0	0
0	39.9007	2.69876	0.292659	0.35	1.20175	3.17	4	3368	13.6899	28	1	0	0	0	0	0	0	0	0	0
0	63.8216	3.9286	0.274762	0.34	1.64247	3.66	5	2668	18.7057	30	1	0	0	0	0	0	0	0	0	0
0	74.2885	5.47519	0.539555	0.23	0.865419	3.27	4	2523	21.2674	24	1	0	0	0	0	0	0	0	0	0
0	62.358	2.24593	0.465918	0.32	0.863553	3.59	5	3898	17.1719	29	1	0	0	0	0	0	0	0	1	0
0	23.0539	4.26719	0.433099	0.36	1.27312	2.33	5	2194	13.7032	28	1	0	0	0	0	0	0	0	0	0
0	69.5709	4.75033	0.370735	0.23	0.641005	3.39	4	2567	23.4077	28	1	0	0	0	0	0	0	0	0	0
0	49.3175	2.79121	0.439435	0.41	0.94892	1.63	5	2929	18.7056	27	1	0	0	0	0	0	0	0	0	0
0	57.401	3.76268	0.431699	0.52	0.798746	3.01	8	3045	21.5465	34	1	0	0	0	0	0	0	0	0	0
0	58.7523	4.67158	0.529331	0.46	0.634883	3.74	5	2788	13.11	26	1	0	0	0	0	0	0	0	0	0
0	48.7522	3.55245	0.451222	0.3	1.18358	4.02	5	2454	24.1248	28	1	0	0	0	0	0	0	0	0	0
0	49.0503	3.58857	0.341728	0.32	0.962483	2.78	5	3035	18.2391	26	1	0	0	0	0	0	0	0	0	0
0	64.2778	4.13657	0.340826	0.33	1.87465	3.11	5	2486	25.525	28	1	0	0	0	0	0	0	0	0	0
0	59.9985	3.7552	0.31458	0.44	-0.106119	1.82	5	2849	21.6149	30	1	0	0	0	0	0	0	0	0	0
1	63.8758	3.24118	0.325396	0.38	1.27233	1.5	4	3273	22.1178	22	1	0	0	0	0	0	0	0	0	0
1	83.253	3.67368	0.338567	0.29	0.692781	2.57	6	3554	22.4097	28	1	0	0	0	0	0	0	0	0	0
1	59.342	5.77008	0.489872	0.23	0.90423	2.78	6	3586	21.0226	28	1	0	0	0	0	0	0	0	0	0
1	52.9829	4.72349	0.121734	0.44	0.587083	2.49	6	3498	23.624	25	1	0	0	0	0	0	0	0	0	0
1	19.3391	2.86893	0.290346	0.28	1.2459	2.02	6	2951	27.9655	28	1	0	0	0	0	0	0	0	0	0
1	87.5494	2.52636	0.349328	0.43	1.55295	1.72	4	2269	22.4529	30	1	0	0	0	0	0	0	0	0	0
1	43.3816	3.44411	0.230074	0.39	1.21062	3.24	4	2358	20.9456	30	1	0	0	0	0	0	0	0	0	0
1	83.1391	5.19547	0.530947	0.45	0.657005	3.28	5	3394	20.6589	27	1	0	0	0	0	0	0	0	0	0
1	55.3102	4.12096	0.338851	0.49	1.65532	2.47	5	2024	17.2874	36	1	0	0	0	0	0	0	0	0	0
1	71.5029	3.08992	0.247318	0.24	0.952638	3.76	6	3420	21.9908	28	1	0	0	0	0	0	0	0	0	0
1	48.571	4.73238	0.270674	0.48	1.08797	2.59	5	3088	16.5448	24	1	0	0	0	0	0	0	0	0	0
1	57.214	3.67912	0.45354	0.45	0.997879	3.26	6	3961	17.632	27	1	0	0	0	0	0	0	0	0	0
1	53.0744	2.65521	0.556853	0.35	0.93206	2.11	4	3074	26.2491	32	1	0	0	0	0	0	0	0	0	0
1	47.5078	4.29573	0.350221	0.38	1.04934	3	6	2090	16.1135	26	1	0	0	0	0	0	0	0	0	0
1	48.4223	5.39808	0.374198	0.43	0.6101	3.04	4	3459	28.7126	29	1	0	0	0	0	0	0	0	0	0
1	64.1898	4.26801	0.264773	0.45	1.47304	2.78	5	3583	23.7998	27	1	0	0	0	0	0	0	0	0	0
1	47.2944	4.01655	0.499593	0.21	1.27274	3.34	5	2889	27.4541	27	1	0	0	0	0	0	0	0	0	0
1	21.7455	3.13686	0.438017	0.52	1.04849	2.48	4	2942	22.9439	33	1	0	0	0	0	0	0	0	0	0
1	47.3719	4.40691	0.121641	0.24	1.39093	1.17	6	3265	20.742	23	1	0	0	0	0	0	0	0	0	0
1	57.608	2.70717	0.296215	0.18	0.534389	2.34	5	3196	27.195	29	1	0	0	0	0	0	0	0	0	0
1	58.6747	2.10299	0.338833	0.47	1.44614	3.11	4	3072	21.4576	28	1	0	0	0	0	0	0	0	0	0
1	58.6763	3.77247	0.248226	0.23	1.10111	1.26	6	3104	19.9418	33	1	0	0	0	0	0	0	0	0	0
1	26.5539	3.78156	0.334779	0.36	1.21619	1.37	5	3993	19.3946	29	1	0	0	0	0	0	0	0	0	0
1	55.2281	6.27017	0.245605	0.25	0.837256	2.59	5	3585	19.5129	32	1	0	0	0	0	0	0	0	0	0
1	63.5641	2.55599	0.40035	0.2	0.708203	2.66	6	4023	22.9314	29	1	0	0	0	0	0	0	0	0	0
1	67.8595	3.99468	0.397897	0.34	0.801497	3.43	4	2892	22.7448	26	1	0	0	0	0	0	0	0	0	0
1	46.9674	4.65233	0.447173	0.44	1.42683	2.54	5	2889	21.6095	30	1	0	0	0	0	0	0	0	0	0
1	45.6187	4.90698	0.406275	0.41	1.44837	2.93	5	2935	15.1141	25	1	0	0	0	0	0	0	0	0	0
1	70.7989	3.80631	0.528356	0.32	1.63177	2.77	3	3411	17.5491	25	1	0	0	0	0	0	0	0	0	0
1	26.8902	3.04662	0.323074	0.38	0.992838	3.1	5	3901	13.604	33	1	0	0	0	0	0	0	0	0	0
1	44.0195	3.74921	0.139881	0.37	0.718571	3.22	5	3273	17.1946	29	1	0	0	0	0	0	0	0	0	0
1	56.4625	5.82911	0.365763	0.38	1.5992	1.64	5	2932	27.7425	24	1	0	0	0	0	0	0	0	0	0
1	27.5881	4.31807	0.430469	0.34	0.404065	2.1	6	3221	26.6189	27	1	0	0	0	0	0	0	0	0	0
1	53.9881	1.69716	0.321509	0.42	0.954551	3.22	5	2924	18.8958	31	1	0	0	0	0	0	0	0	0	0
1	76.2257	5.29367	0.508324	0.27	1.25572	1.06	4	2991	25.6763	30	1	0	0	0	0	0	0	0	0	0
1	50.041	4.37798	0.476592	0.42	0.558045	0.78	5	2631	20.9169	27	1	0	0	0	0	0	0	0	0	0
1	46.2231	3.78262	0.418822	0.35	0.400844	2.67	4	3144	20.7681	26	1	0	0	0	0	0	0	0	0	0
1	56.7053	3.79891	0.370336	0.35	1.21064	2.6	4	2885	25.0081	28	1	0	0	0	0	0	0	0	0	0
1	46.2145	3.66209	0.305932	0.45	1.65792	2.33	3	2610	20.9438	32	1	0	0	0	0	0	0	0	0	0
1	61.4149	4.08351	0.34476	0.34	0.734899	3.17	5	3084	25.5422	27	1	0	0	0	0	0	0	0	0	0
1	62.6816	3.29489	0.41174	0.28	0.745983	3.41	6	3300	22.3961	32	1	0	0	0	0	0	0	0	0	0
1	50.1349	4.10472	0.463429	0.26	0.64525	3.28	5	3006	18.0106	31	1	0	0	0	0	0	0	0	0	0
1	33.7252	2.85155	0.332406	0.45	1.60405	2.45	4	2962	22.7849	28	1	0	0	0	0	0	0	0	0	0
1	31.756	4.025	0.287609	0.15	0.737587	2.56	5	2970	21.262	23	1	0	0	0	0	0	0	0	0	0
1	41.8466	4.96531	0.619736	0.34	0.68641	2.79	6	3534	19.6148	26	1	0	0	0	0	0	0	0	0	0
1	61.1921	4.34552	0.416859	0.4	0.699614	1.09	6	3413	20.6777	31	1	0	0	0	0	0	0	0	0	0
1	22.8514	4.88951	0.269431	0.25	0.785019	1.87	6	3066	21.4208	34	1	0	0	0	0	0	0	0	0	0
1	23.8515	2.68612	0.459613	0.38	0.781141	3.14	5	2659	23.5456	31	1	0	0	0	0	0	0	0	0	0
1	41.0009	3.87426	0.369498	0.45	1.25698	2.75	5	3102	21.6328	26	1	0	0	0	0	0	0	0	0	0
1	55.585	4.45757	0.448812	0.2	1.13657	1.66	4	2493	22.1058	29	1	0	0	0	0	0	0	0	0	0
1	37.3863	2.70983	0.368472	0.29	1.20494	3.48	5	3584	17.0071	27	1	0	0	0	0	0	0	0	0	0
1	62.4355	5.4413	0.357046	0.55	0.768305	2.92	5	3249	20.7432	27	1	0	0	0	0	0	0	0	0	0
1	54.7359	2.74426	0.372496	0.32	1.30364	2.16	5	3765	21.0207	25	1	0	0	0	0	0	0	0	0	0
1	47.7232	3.98805	0.405894	0.29	-0.185198	2.59	5	3582	20.1499	26	1	0	0	0	0	0	0	0	0	0
1	61.4905	3.9749	0.299859	0.3	1.46296	2.63	3	3290	20.0019	31	1	0	0	0	0	0	0	0	0	0
1	55.5011	3.94362	0.295165	0.34	1.09631	2.37	5	2864	21.4237	35	1	0	0	0	0	0	0	1	0	0
1	43.8928	3.59921	0.343948	0.4	0.857255	2.45	5	3024	21.3959	31	1	0	0	0	0	0	0	0	0	0
1	53.3131	4.28405	0.380861	0.31	1.20525	2.47	4	2529	23.0222	25	1	0	0	0	0	0	0	0	0	0
1	59.1068	2.74804	0.330202	0.4	0.534004	3.04	5	2986	26.3343	26	1	0	0	0	0	0	0	0	0	0
1	55.0547	2.48027	0.395963	0.45	0.767312	3.28	5	3615	20.6343	35	1	0	0	0	0	0	0	0	0	0
1	40.942	3.1386	0.248892	0.41	1.06048	2.97	4	3156	20.4751	27	1	0	0	0	0	0	0	0	0	0
1	61.9966	3.75798	0.214763	0.45	0.399872	3.8	5	3153	28.6432	26	1	0	0	0	0	0	0	0	0	0
1	66.1392	5.12078	0.559238	0.3	1.00143	3.01	4	2878	19.9823	27	1	0	0	0	0	0	0	0	0	0
1	53.9415	5.46374	0.404349	0.37	1.00298	2.8	4	3689	19.4824	36	1	0	0	0	0	0	0	0	0	0
1	52.1025	4.14876	0.321945	0.45	0.907116	3.17	7	3321	23.1462	30	1	0	0	0	0	0	0	0	0	0
1	49.0452	4.21317	0.334081	0.39	0.50634	2.48	6	2686	20.9137	28	1	0	0	0	0	0	0	0	0	0
1	80.171	3.56476	0.444492	0.4	1.47841	3.09	4	3211	23.0409	32	1	0	0	0	0	0	0	0	0	0
1	53.9421	3.86727	0.3413	0.39	0.430372	3.99	5	3589	24.0463	24	1	0	0	0	0	0	0	0	0	0
1	47.895	2.36081	0.383018	0.4	0.433633	2.43	5	2958	30.9981	28	1	0	0	0	0	0	0	0	0	0
1	15.2028	4.11812	0.33566	0.38	0.787099	3.3	5	3097	25.6143	31	1	0	0	0	0	0	0	0	0	0
1	28.3184	3.26202	0.311126	0.27	1.62956	2.6	6	2918	24.6283	25	1	0	0	0	0	0	0	0	0	0
1	49.0167	4.16452	0.425529	0.4	1.05957	2.05	7	3671	22.4424	27	1	0	0	0	0	0	0	0	0	0
1	52.9678	3.45863	0.377771	0.34	1.11991	3.37	5	3133	20.0207	30	1	0	0	0	0	0	0	0	0	0
1	53.9498	3.13129	0.498055	0.52	0.931986	2.9	6	4291	21.561	24	1	0	0	0	0	0	0	0	0	0
1	61.5277	3.5902	0.246439	0.33	1.12437	2.36	6	2167	17.8442	22	1	0	0	0	0	0	0	0	0	0
1	47.396	3.43693	0.349076	0.4	1.26755	3.81	5	3057	24.1812	28	1	0	0	0	0	0	0	0	0	0
1	66.997	4.95259	0.341438	0.19	1.2969	1.28	5	3489	23.5581	35	1	0	0	0	0	0	0	0	0	0
1	37.2757	4.0344	0.251678	0.32	1.55898	2.53	6	2960	25.8053	26	1	0	0	0	0	0	0	0	0	0
1	33.2834	4.26596	0.466546	0.3	0.709878	2.43	5	4032	17.948	24	1	0	0	0	0	0	0	0	0	0
1	32.9976	2.53058	0.351969	0.5	0.954856	2.49	3	3073	20.4895	28	1	0	0	0	0	0	0	0	0	0
1	60.4256	5.36975	0.219469	0.37	1.18075	2.66	5	2601	18.041	33	1	0	0	0	0	0	0	0	0	0
1	48.9437	3.98271	0.301719	0.39	1.34338	3.88	4	2876	20.6643	26	1	0	0	0	0	0	0	0	0	0
1	61.0868	2.92941	0.248519	0.41	0.885739	1.12	5	2974	22.1171	31	1	0	0	0	0	0	0	0	0	0
1	46.3726	4.13794	0.47082	0.33	1.2745	3.31	5	3128	24.2419	28	1	0	0	0	0	0	0	0	0	0
1	41.862	4.72014	0.626712	0.41	0.800608	2.04	3	3153	22.4178	23	1	0	0	0	0	0	0	0	0	0
1	44.9723	2.38246	0.293262	0.53	0.882398	3.24	5	3765	19.258	29	1	0	0	0	0	0	0	0	0	0
1	24.3205	5.5702	0.353542	0.44	1.4173	2.26	6	2762	21.081	30	1	0	0	0	0	0	0	0	0	0
1	33.8236	3.65354	0.392102	0.45	0.273342	3.18	5	2865	18.0841	28	1	0	0	0	0	0	0	0	0	0
1	30.0333	4.98017	0.643926	0.3	1.10488	2.42	4	3073	22.7875	29	1	0	0	0	0	0	0	0	0	0
1	64.7671	3.89237	0.121667	0.4	1.38323	2.15	5	2547	23.3491	26	1	0	0	0	0	0	0	0	0	0
1	41.7863	3.47269	0.309824	0.41	0.881094	1.72	5	3174	17.0844	27	1	0	0	0	0	0	0	0	0	0
1	61.0818	1.91448	0.238416	0.32	1.26426	1.88	5	3209	24.0175	28	1	0	0	0	0	0	0	0	0	0
1	71.1976	2.67647	0.339506	0.39	0.738155	2.32	5	2525	24.6013	33	1	0	0	0	0	0	0	0	0	0
1	47.4291	3.77456	0.334502	0.57	1.08499	2.55	5	2503	23.6286	24	1	0	0	0	0	0	0	0	0	0
1	54.0473	4.67598	0.287447	0.28	1.0212	2.94	5	3046	24.4061	26	1	0	0	0	0	0	0	0	0	0
1	25.7334	1.86599	0.55324	0.43	1.00604	2.52	6	2765	18.1484	29	1	0	0	0	0	0	0	0	0	0
1	38.7066	5.24387	0.389752	0.28	0.513193	3.44	6	3411	18.3193	25	1	0	0	0	0	0	0	0	0	0
1	50.8796	5.26829	0.611233	0.42	0.953088	1.71	6	2818	25.9444	25	1	0	0	0	0	0	0	0	0	0
1	54.2589	2.63173	0.448483	0.28	0.695693	2.97	5	3042	23.8911	28	1	0	0	0	0	0	0	0	0	0
1	39.5313	4.30724	0.231935	0.44	0.875233	3.22	6	3282	20.3386	27	1	0	0	0	0	0	0	0	0	0
1	87.4541	2.74547	0.284992	0.26	1.42208	2.94	4	2723	23.4448	30	1	0	0	0	0	0	0	0	0	0
